# Supplementary material for: Optical properties of bimetallic compositional heterodimers
Source: Royal Society of Chemistry journal article supplement (doi:10.1039/c8cp03346c), 2018-01-01
Supplement: c8cp03346c1.pdf [file c8cp03346c1.pdf]

## **Supplementary Information**

### **Optical Properties of Bimetallic Compositional Heterodimers**

Junais Habeeb Mokkath

[j.mokath@kcst.edu.kw](mailto:j.mokath@kcst.edu.kw)

Department of Physics, Kuwait College of Science And Technology, Doha Area, 7th Ring Road, P.O.  
Box 27235, Kuwait

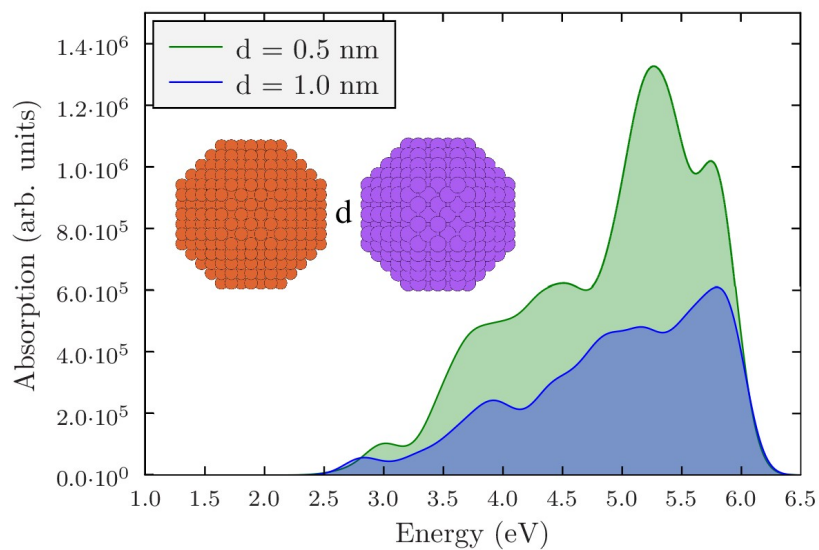

Figure S1: TDDFT calculated absorption spectra of **Li 1.50 nm and Na 1.50 nm heterodimer** as a function of different  $d$  values.

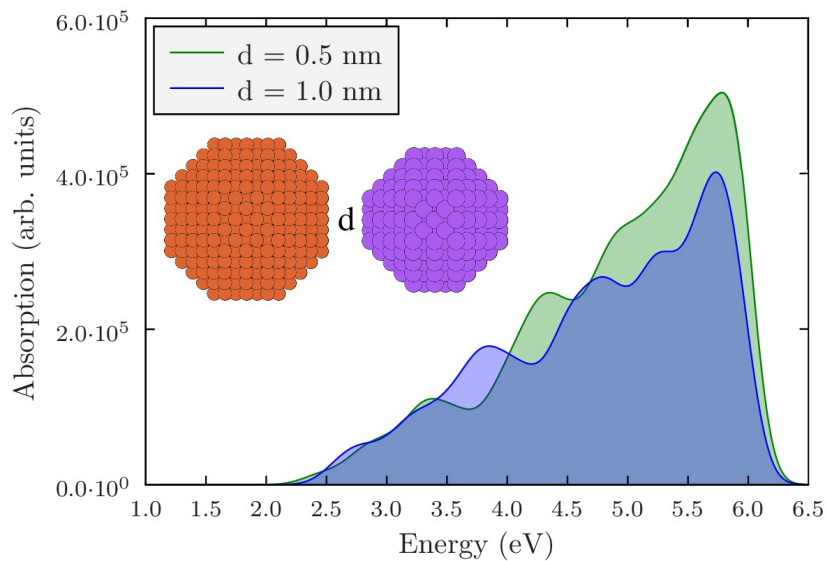

Figure S2: TDDFT calculated absorption spectra of **Li 1.50 nm and Na 1.25 nm heterodimer** as a function of different  $d$  values.

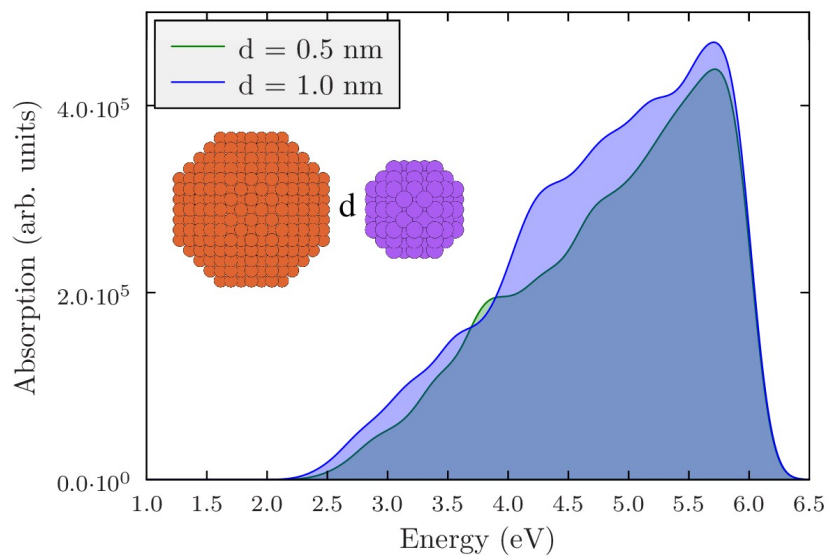

Figure S3: TDDFT calculated absorption spectra of **Li 1.50 nm and Na 1.0 nm heterodimer** as a function of different  $d$  values.

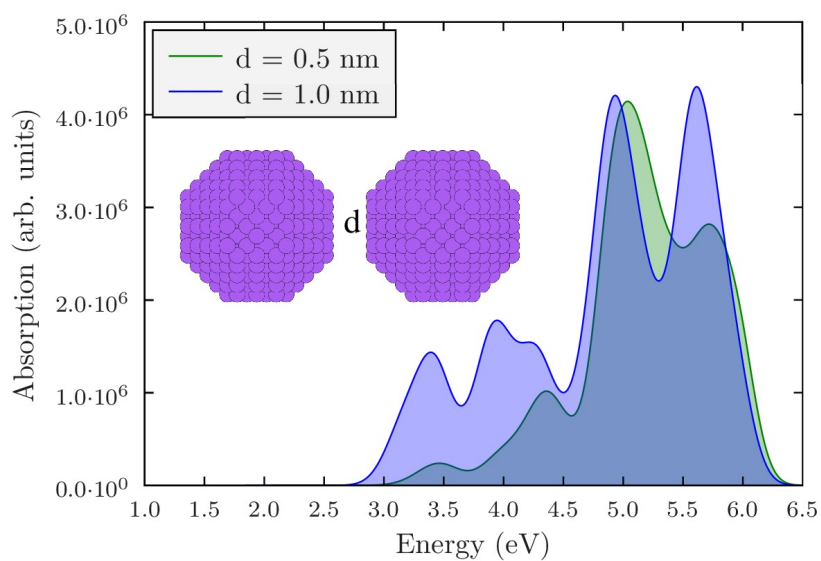

Figure S4: TDDFT calculated absorption spectra of **Na 1.50 nm and Na 1.50 nm heterodimer** as a function of different  $d$  values.

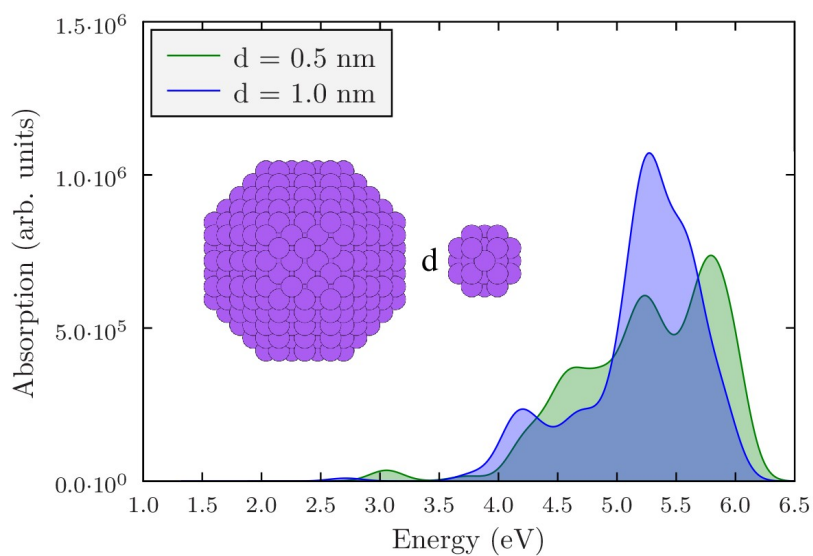

Figure S5: TDDFT calculated absorption spectra of **Na 1.50 nm and Na 0.50 nm heterodimer** as a function of different  $d$  values.

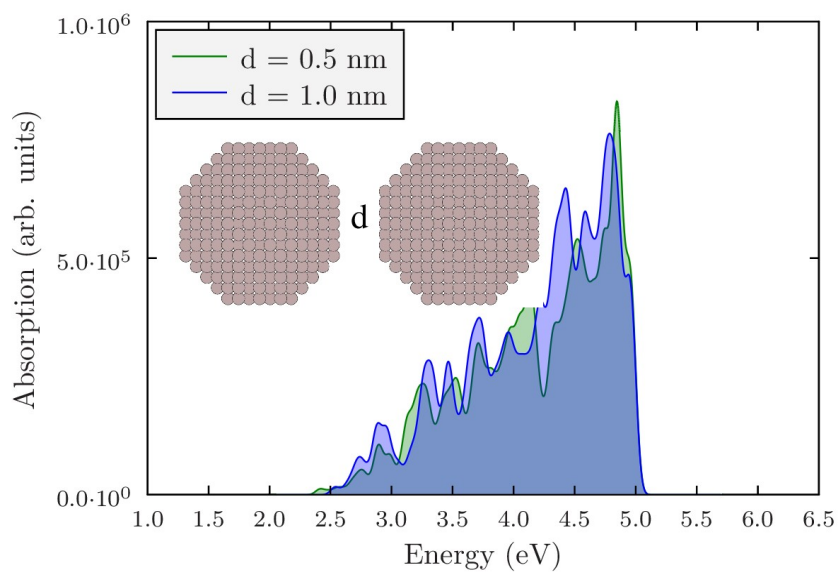

Figure S6: TDDFT calculated absorption spectra of **Al 1.50 nm and Al 1.50 nm heterodimer** as a function of different  $d$  values.

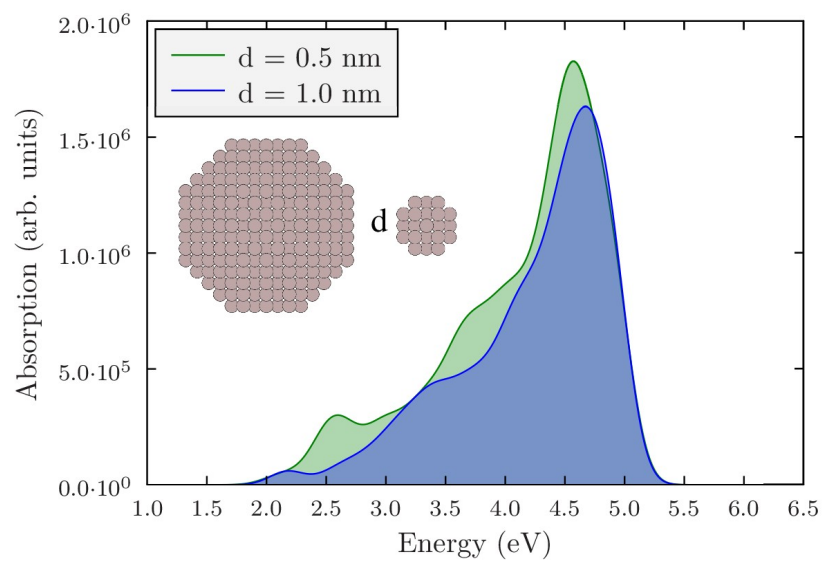

Figure S7: TDDFT calculated absorption spectra of **Al 1.50 nm and Al 0.50 nm heterodimer** as a function of different  $d$  values.

### Atomic coordinates of Na 1.50 nm nanoparticle

|    |              |              |              |
|----|--------------|--------------|--------------|
| Na | 2.822311e+01 | 1.809916e+01 | 1.000000e+01 |
| Na | 3.024790e+01 | 2.012395e+01 | 1.000000e+01 |
| Na | 2.822311e+01 | 1.607437e+01 | 1.202479e+01 |
| Na | 3.024790e+01 | 1.809916e+01 | 1.202479e+01 |
| Na | 3.227269e+01 | 2.012395e+01 | 1.202479e+01 |
| Na | 2.822311e+01 | 1.404958e+01 | 1.404958e+01 |
| Na | 3.024790e+01 | 1.607437e+01 | 1.404958e+01 |
| Na | 3.227269e+01 | 1.809916e+01 | 1.404958e+01 |
| Na | 3.429748e+01 | 2.012395e+01 | 1.404958e+01 |
| Na | 2.822311e+01 | 1.202479e+01 | 1.607437e+01 |
| Na | 3.024790e+01 | 1.404958e+01 | 1.607437e+01 |
| Na | 3.227269e+01 | 1.607437e+01 | 1.607437e+01 |
| Na | 3.429748e+01 | 1.809916e+01 | 1.607437e+01 |
| Na | 3.632227e+01 | 2.012395e+01 | 1.607437e+01 |
| Na | 2.822311e+01 | 1.000000e+01 | 1.809916e+01 |
| Na | 3.024790e+01 | 1.202479e+01 | 1.809916e+01 |
| Na | 3.227269e+01 | 1.404958e+01 | 1.809916e+01 |
| Na | 3.429748e+01 | 1.607437e+01 | 1.809916e+01 |
| Na | 3.632227e+01 | 1.809916e+01 | 1.809916e+01 |
| Na | 3.834706e+01 | 2.012395e+01 | 1.809916e+01 |
| Na | 3.024790e+01 | 1.000000e+01 | 2.012395e+01 |
| Na | 3.227269e+01 | 1.202479e+01 | 2.012395e+01 |
| Na | 3.429748e+01 | 1.404958e+01 | 2.012395e+01 |
| Na | 3.632227e+01 | 1.607437e+01 | 2.012395e+01 |
| Na | 3.834706e+01 | 1.809916e+01 | 2.012395e+01 |
| Na | 2.417353e+01 | 1.809916e+01 | 1.000000e+01 |
| Na | 2.619832e+01 | 2.012395e+01 | 1.000000e+01 |
| Na | 2.822311e+01 | 2.214874e+01 | 1.000000e+01 |
| Na | 3.024790e+01 | 2.417353e+01 | 1.000000e+01 |
| Na | 2.417353e+01 | 1.607437e+01 | 1.202479e+01 |

Na 2.619832e+01 1.809916e+01 1.202479e+01  
Na 2.822311e+01 2.012395e+01 1.202479e+01  
Na 3.024790e+01 2.214874e+01 1.202479e+01  
Na 3.227269e+01 2.417353e+01 1.202479e+01  
Na 2.417353e+01 1.404958e+01 1.404958e+01  
Na 2.619832e+01 1.607437e+01 1.404958e+01  
Na 2.822311e+01 1.809916e+01 1.404958e+01  
Na 3.024790e+01 2.012395e+01 1.404958e+01  
Na 3.227269e+01 2.214874e+01 1.404958e+01  
Na 3.429748e+01 2.417353e+01 1.404958e+01  
Na 2.417353e+01 1.202479e+01 1.607437e+01  
Na 2.619832e+01 1.404958e+01 1.607437e+01  
Na 2.822311e+01 1.607437e+01 1.607437e+01  
Na 3.024790e+01 1.809916e+01 1.607437e+01  
Na 3.227269e+01 2.012395e+01 1.607437e+01  
Na 3.429748e+01 2.214874e+01 1.607437e+01  
Na 3.632227e+01 2.417353e+01 1.607437e+01  
Na 2.417353e+01 1.000000e+01 1.809916e+01  
Na 2.619832e+01 1.202479e+01 1.809916e+01  
Na 2.822311e+01 1.404958e+01 1.809916e+01  
Na 3.024790e+01 1.607437e+01 1.809916e+01  
Na 3.227269e+01 1.809916e+01 1.809916e+01  
Na 3.429748e+01 2.012395e+01 1.809916e+01  
Na 3.632227e+01 2.214874e+01 1.809916e+01  
Na 3.834706e+01 2.417353e+01 1.809916e+01  
Na 2.619832e+01 1.000000e+01 2.012395e+01  
Na 2.822311e+01 1.202479e+01 2.012395e+01  
Na 3.024790e+01 1.404958e+01 2.012395e+01  
Na 3.227269e+01 1.607437e+01 2.012395e+01  
Na 3.429748e+01 1.809916e+01 2.012395e+01  
Na 3.632227e+01 2.012395e+01 2.012395e+01  
Na 3.834706e+01 2.214874e+01 2.012395e+01  
Na 2.822311e+01 1.000000e+01 2.214874e+01

Na 3.024790e+01 1.202479e+01 2.214874e+01  
Na 3.227269e+01 1.404958e+01 2.214874e+01  
Na 3.429748e+01 1.607437e+01 2.214874e+01  
Na 3.632227e+01 1.809916e+01 2.214874e+01  
Na 3.834706e+01 2.012395e+01 2.214874e+01  
Na 3.024790e+01 1.000000e+01 2.417353e+01  
Na 3.227269e+01 1.202479e+01 2.417353e+01  
Na 3.429748e+01 1.404958e+01 2.417353e+01  
Na 3.632227e+01 1.607437e+01 2.417353e+01  
Na 3.834706e+01 1.809916e+01 2.417353e+01  
Na 2.012395e+01 1.809916e+01 1.000000e+01  
Na 2.214874e+01 2.012395e+01 1.000000e+01  
Na 2.417353e+01 2.214874e+01 1.000000e+01  
Na 2.619832e+01 2.417353e+01 1.000000e+01  
Na 2.822311e+01 2.619832e+01 1.000000e+01  
Na 3.024790e+01 2.822311e+01 1.000000e+01  
Na 2.012395e+01 1.607437e+01 1.202479e+01  
Na 2.214874e+01 1.809916e+01 1.202479e+01  
Na 2.417353e+01 2.012395e+01 1.202479e+01  
Na 2.619832e+01 2.214874e+01 1.202479e+01  
Na 2.822311e+01 2.417353e+01 1.202479e+01  
Na 3.024790e+01 2.619832e+01 1.202479e+01  
Na 3.227269e+01 2.822311e+01 1.202479e+01  
Na 2.012395e+01 1.404958e+01 1.404958e+01  
Na 2.214874e+01 1.607437e+01 1.404958e+01  
Na 2.417353e+01 1.809916e+01 1.404958e+01  
Na 2.619832e+01 2.012395e+01 1.404958e+01  
Na 2.822311e+01 2.214874e+01 1.404958e+01  
Na 3.024790e+01 2.417353e+01 1.404958e+01  
Na 3.227269e+01 2.619832e+01 1.404958e+01  
Na 3.429748e+01 2.822311e+01 1.404958e+01  
Na 2.012395e+01 1.202479e+01 1.607437e+01  
Na 2.214874e+01 1.404958e+01 1.607437e+01



Na 2.417353e+01 1.607437e+01 1.607437e+01  
Na 2.619832e+01 1.809916e+01 1.607437e+01  
Na 2.822311e+01 2.012395e+01 1.607437e+01  
Na 3.024790e+01 2.214874e+01 1.607437e+01  
Na 3.227269e+01 2.417353e+01 1.607437e+01  
Na 3.429748e+01 2.619832e+01 1.607437e+01  
Na 3.632227e+01 2.822311e+01 1.607437e+01  
Na 2.012395e+01 1.000000e+01 1.809916e+01  
Na 2.214874e+01 1.202479e+01 1.809916e+01  
Na 2.417353e+01 1.404958e+01 1.809916e+01  
Na 2.619832e+01 1.607437e+01 1.809916e+01  
Na 2.822311e+01 1.809916e+01 1.809916e+01  
Na 3.024790e+01 2.012395e+01 1.809916e+01  
Na 3.227269e+01 2.214874e+01 1.809916e+01  
Na 3.429748e+01 2.417353e+01 1.809916e+01  
Na 3.632227e+01 2.619832e+01 1.809916e+01  
Na 3.834706e+01 2.822311e+01 1.809916e+01  
Na 2.214874e+01 1.000000e+01 2.012395e+01  
Na 2.417353e+01 1.202479e+01 2.012395e+01  
Na 2.619832e+01 1.404958e+01 2.012395e+01  
Na 2.822311e+01 1.607437e+01 2.012395e+01  
Na 3.024790e+01 1.809916e+01 2.012395e+01  
Na 3.227269e+01 2.012395e+01 2.012395e+01  
Na 3.429748e+01 2.214874e+01 2.012395e+01  
Na 3.632227e+01 2.417353e+01 2.012395e+01  
Na 3.834706e+01 2.619832e+01 2.012395e+01  
Na 2.417353e+01 1.000000e+01 2.214874e+01  
Na 2.619832e+01 1.202479e+01 2.214874e+01  
Na 2.822311e+01 1.404958e+01 2.214874e+01  
Na 3.024790e+01 1.607437e+01 2.214874e+01  
Na 3.227269e+01 1.809916e+01 2.214874e+01  
Na 3.429748e+01 2.012395e+01 2.214874e+01  
Na 3.632227e+01 2.214874e+01 2.214874e+01

Na 3.834706e+01 2.417353e+01 2.214874e+01  
Na 2.619832e+01 1.000000e+01 2.417353e+01  
Na 2.822311e+01 1.202479e+01 2.417353e+01  
Na 3.024790e+01 1.404958e+01 2.417353e+01  
Na 3.227269e+01 1.607437e+01 2.417353e+01  
Na 3.429748e+01 1.809916e+01 2.417353e+01  
Na 3.632227e+01 2.012395e+01 2.417353e+01  
Na 3.834706e+01 2.214874e+01 2.417353e+01  
Na 2.822311e+01 1.000000e+01 2.619832e+01  
Na 3.024790e+01 1.202479e+01 2.619832e+01  
Na 3.227269e+01 1.404958e+01 2.619832e+01  
Na 3.429748e+01 1.607437e+01 2.619832e+01  
Na 3.632227e+01 1.809916e+01 2.619832e+01  
Na 3.834706e+01 2.012395e+01 2.619832e+01  
Na 3.024790e+01 1.000000e+01 2.822311e+01  
Na 3.227269e+01 1.202479e+01 2.822311e+01  
Na 3.429748e+01 1.404958e+01 2.822311e+01  
Na 3.632227e+01 1.607437e+01 2.822311e+01  
Na 3.834706e+01 1.809916e+01 2.822311e+01  
Na 1.809916e+01 2.012395e+01 1.000000e+01  
Na 2.012395e+01 2.214874e+01 1.000000e+01  
Na 2.214874e+01 2.417353e+01 1.000000e+01  
Na 2.417353e+01 2.619832e+01 1.000000e+01  
Na 2.619832e+01 2.822311e+01 1.000000e+01  
Na 2.822311e+01 3.024790e+01 1.000000e+01  
Na 1.809916e+01 1.809916e+01 1.202479e+01  
Na 2.012395e+01 2.012395e+01 1.202479e+01  
Na 2.214874e+01 2.214874e+01 1.202479e+01  
Na 2.417353e+01 2.417353e+01 1.202479e+01  
Na 2.619832e+01 2.619832e+01 1.202479e+01  
Na 2.822311e+01 2.822311e+01 1.202479e+01  
Na 3.024790e+01 3.024790e+01 1.202479e+01  
Na 1.809916e+01 1.607437e+01 1.404958e+01

Na 2.012395e+01 1.809916e+01 1.404958e+01  
Na 2.214874e+01 2.012395e+01 1.404958e+01  
Na 2.417353e+01 2.214874e+01 1.404958e+01  
Na 2.619832e+01 2.417353e+01 1.404958e+01  
Na 2.822311e+01 2.619832e+01 1.404958e+01  
Na 3.024790e+01 2.822311e+01 1.404958e+01  
Na 3.227269e+01 3.024790e+01 1.404958e+01  
Na 1.809916e+01 1.404958e+01 1.607437e+01  
Na 2.012395e+01 1.607437e+01 1.607437e+01  
Na 2.214874e+01 1.809916e+01 1.607437e+01  
Na 2.417353e+01 2.012395e+01 1.607437e+01  
Na 2.619832e+01 2.214874e+01 1.607437e+01  
Na 2.822311e+01 2.417353e+01 1.607437e+01  
Na 3.024790e+01 2.619832e+01 1.607437e+01  
Na 3.227269e+01 2.822311e+01 1.607437e+01  
Na 3.429748e+01 3.024790e+01 1.607437e+01  
Na 1.809916e+01 1.202479e+01 1.809916e+01  
Na 2.012395e+01 1.404958e+01 1.809916e+01  
Na 2.214874e+01 1.607437e+01 1.809916e+01  
Na 2.417353e+01 1.809916e+01 1.809916e+01  
Na 2.619832e+01 2.012395e+01 1.809916e+01  
Na 2.822311e+01 2.214874e+01 1.809916e+01  
Na 3.024790e+01 2.417353e+01 1.809916e+01  
Na 3.227269e+01 2.619832e+01 1.809916e+01  
Na 3.429748e+01 2.822311e+01 1.809916e+01  
Na 3.632227e+01 3.024790e+01 1.809916e+01  
Na 1.809916e+01 1.000000e+01 2.012395e+01  
Na 2.012395e+01 1.202479e+01 2.012395e+01  
Na 2.214874e+01 1.404958e+01 2.012395e+01  
Na 2.417353e+01 1.607437e+01 2.012395e+01  
Na 2.619832e+01 1.809916e+01 2.012395e+01  
Na 2.822311e+01 2.012395e+01 2.012395e+01  
Na 3.024790e+01 2.214874e+01 2.012395e+01

Na 3.227269e+01 2.417353e+01 2.012395e+01  
Na 3.429748e+01 2.619832e+01 2.012395e+01  
Na 3.632227e+01 2.822311e+01 2.012395e+01  
Na 3.834706e+01 3.024790e+01 2.012395e+01  
Na 2.012395e+01 1.000000e+01 2.214874e+01  
Na 2.214874e+01 1.202479e+01 2.214874e+01  
Na 2.417353e+01 1.404958e+01 2.214874e+01  
Na 2.619832e+01 1.607437e+01 2.214874e+01  
Na 2.822311e+01 1.809916e+01 2.214874e+01  
Na 3.024790e+01 2.012395e+01 2.214874e+01  
Na 3.227269e+01 2.214874e+01 2.214874e+01  
Na 3.429748e+01 2.417353e+01 2.214874e+01  
Na 3.632227e+01 2.619832e+01 2.214874e+01  
Na 3.834706e+01 2.822311e+01 2.214874e+01  
Na 2.214874e+01 1.000000e+01 2.417353e+01  
Na 2.417353e+01 1.202479e+01 2.417353e+01  
Na 2.619832e+01 1.404958e+01 2.417353e+01  
Na 2.822311e+01 1.607437e+01 2.417353e+01  
Na 3.024790e+01 1.809916e+01 2.417353e+01  
Na 3.227269e+01 2.012395e+01 2.417353e+01  
Na 3.429748e+01 2.214874e+01 2.417353e+01  
Na 3.632227e+01 2.417353e+01 2.417353e+01  
Na 3.834706e+01 2.619832e+01 2.417353e+01  
Na 2.417353e+01 1.000000e+01 2.619832e+01  
Na 2.619832e+01 1.202479e+01 2.619832e+01  
Na 2.822311e+01 1.404958e+01 2.619832e+01  
Na 3.024790e+01 1.607437e+01 2.619832e+01  
Na 3.227269e+01 1.809916e+01 2.619832e+01  
Na 3.429748e+01 2.012395e+01 2.619832e+01  
Na 3.632227e+01 2.214874e+01 2.619832e+01  
Na 3.834706e+01 2.417353e+01 2.619832e+01  
Na 2.619832e+01 1.000000e+01 2.822311e+01  
Na 2.822311e+01 1.202479e+01 2.822311e+01

Na 3.024790e+01 1.404958e+01 2.822311e+01  
Na 3.227269e+01 1.607437e+01 2.822311e+01  
Na 3.429748e+01 1.809916e+01 2.822311e+01  
Na 3.632227e+01 2.012395e+01 2.822311e+01  
Na 3.834706e+01 2.214874e+01 2.822311e+01  
Na 2.822311e+01 1.000000e+01 3.024790e+01  
Na 3.024790e+01 1.202479e+01 3.024790e+01  
Na 3.227269e+01 1.404958e+01 3.024790e+01  
Na 3.429748e+01 1.607437e+01 3.024790e+01  
Na 3.632227e+01 1.809916e+01 3.024790e+01  
Na 3.834706e+01 2.012395e+01 3.024790e+01  
Na 1.809916e+01 2.417353e+01 1.000000e+01  
Na 2.012395e+01 2.619832e+01 1.000000e+01  
Na 2.214874e+01 2.822311e+01 1.000000e+01  
Na 2.417353e+01 3.024790e+01 1.000000e+01  
Na 1.607437e+01 2.012395e+01 1.202479e+01  
Na 1.809916e+01 2.214874e+01 1.202479e+01  
Na 2.012395e+01 2.417353e+01 1.202479e+01  
Na 2.214874e+01 2.619832e+01 1.202479e+01  
Na 2.417353e+01 2.822311e+01 1.202479e+01  
Na 2.619832e+01 3.024790e+01 1.202479e+01  
Na 2.822311e+01 3.227269e+01 1.202479e+01  
Na 1.607437e+01 1.809916e+01 1.404958e+01  
Na 1.809916e+01 2.012395e+01 1.404958e+01  
Na 2.012395e+01 2.214874e+01 1.404958e+01  
Na 2.214874e+01 2.417353e+01 1.404958e+01  
Na 2.417353e+01 2.619832e+01 1.404958e+01  
Na 2.619832e+01 2.822311e+01 1.404958e+01  
Na 2.822311e+01 3.024790e+01 1.404958e+01  
Na 3.024790e+01 3.227269e+01 1.404958e+01  
Na 1.607437e+01 1.607437e+01 1.607437e+01  
Na 1.809916e+01 1.809916e+01 1.607437e+01  
Na 2.012395e+01 2.012395e+01 1.607437e+01

Na 2.214874e+01 2.214874e+01 1.607437e+01  
Na 2.417353e+01 2.417353e+01 1.607437e+01  
Na 2.619832e+01 2.619832e+01 1.607437e+01  
Na 2.822311e+01 2.822311e+01 1.607437e+01  
Na 3.024790e+01 3.024790e+01 1.607437e+01  
Na 3.227269e+01 3.227269e+01 1.607437e+01  
Na 1.607437e+01 1.404958e+01 1.809916e+01  
Na 1.809916e+01 1.607437e+01 1.809916e+01  
Na 2.012395e+01 1.809916e+01 1.809916e+01  
Na 2.214874e+01 2.012395e+01 1.809916e+01  
Na 2.417353e+01 2.214874e+01 1.809916e+01  
Na 2.619832e+01 2.417353e+01 1.809916e+01  
Na 2.822311e+01 2.619832e+01 1.809916e+01  
Na 3.024790e+01 2.822311e+01 1.809916e+01  
Na 3.227269e+01 3.024790e+01 1.809916e+01  
Na 3.429748e+01 3.227269e+01 1.809916e+01  
Na 1.607437e+01 1.202479e+01 2.012395e+01  
Na 1.809916e+01 1.404958e+01 2.012395e+01  
Na 2.012395e+01 1.607437e+01 2.012395e+01  
Na 2.214874e+01 1.809916e+01 2.012395e+01  
Na 2.417353e+01 2.012395e+01 2.012395e+01  
Na 2.619832e+01 2.214874e+01 2.012395e+01  
Na 2.822311e+01 2.417353e+01 2.012395e+01  
Na 3.024790e+01 2.619832e+01 2.012395e+01  
Na 3.227269e+01 2.822311e+01 2.012395e+01  
Na 3.429748e+01 3.024790e+01 2.012395e+01  
Na 3.632227e+01 3.227269e+01 2.012395e+01  
Na 1.809916e+01 1.202479e+01 2.214874e+01  
Na 2.012395e+01 1.404958e+01 2.214874e+01  
Na 2.214874e+01 1.607437e+01 2.214874e+01  
Na 2.417353e+01 1.809916e+01 2.214874e+01  
Na 2.619832e+01 2.012395e+01 2.214874e+01  
Na 2.822311e+01 2.214874e+01 2.214874e+01

Na 3.024790e+01 2.417353e+01 2.214874e+01  
Na 3.227269e+01 2.619832e+01 2.214874e+01  
Na 3.429748e+01 2.822311e+01 2.214874e+01  
Na 3.632227e+01 3.024790e+01 2.214874e+01  
Na 1.809916e+01 1.000000e+01 2.417353e+01  
Na 2.012395e+01 1.202479e+01 2.417353e+01  
Na 2.214874e+01 1.404958e+01 2.417353e+01  
Na 2.417353e+01 1.607437e+01 2.417353e+01  
Na 2.619832e+01 1.809916e+01 2.417353e+01  
Na 2.822311e+01 2.012395e+01 2.417353e+01  
Na 3.024790e+01 2.214874e+01 2.417353e+01  
Na 3.227269e+01 2.417353e+01 2.417353e+01  
Na 3.429748e+01 2.619832e+01 2.417353e+01  
Na 3.632227e+01 2.822311e+01 2.417353e+01  
Na 3.834706e+01 3.024790e+01 2.417353e+01  
Na 2.012395e+01 1.000000e+01 2.619832e+01  
Na 2.214874e+01 1.202479e+01 2.619832e+01  
Na 2.417353e+01 1.404958e+01 2.619832e+01  
Na 2.619832e+01 1.607437e+01 2.619832e+01  
Na 2.822311e+01 1.809916e+01 2.619832e+01  
Na 3.024790e+01 2.012395e+01 2.619832e+01  
Na 3.227269e+01 2.214874e+01 2.619832e+01  
Na 3.429748e+01 2.417353e+01 2.619832e+01  
Na 3.632227e+01 2.619832e+01 2.619832e+01  
Na 3.834706e+01 2.822311e+01 2.619832e+01  
Na 2.214874e+01 1.000000e+01 2.822311e+01  
Na 2.417353e+01 1.202479e+01 2.822311e+01  
Na 2.619832e+01 1.404958e+01 2.822311e+01  
Na 2.822311e+01 1.607437e+01 2.822311e+01  
Na 3.024790e+01 1.809916e+01 2.822311e+01  
Na 3.227269e+01 2.012395e+01 2.822311e+01  
Na 3.429748e+01 2.214874e+01 2.822311e+01  
Na 3.632227e+01 2.417353e+01 2.822311e+01

Na 3.834706e+01 2.619832e+01 2.822311e+01  
Na 2.417353e+01 1.000000e+01 3.024790e+01  
Na 2.619832e+01 1.202479e+01 3.024790e+01  
Na 2.822311e+01 1.404958e+01 3.024790e+01  
Na 3.024790e+01 1.607437e+01 3.024790e+01  
Na 3.227269e+01 1.809916e+01 3.024790e+01  
Na 3.429748e+01 2.012395e+01 3.024790e+01  
Na 3.632227e+01 2.214874e+01 3.024790e+01  
Na 3.834706e+01 2.417353e+01 3.024790e+01  
Na 2.822311e+01 1.202479e+01 3.227269e+01  
Na 3.024790e+01 1.404958e+01 3.227269e+01  
Na 3.227269e+01 1.607437e+01 3.227269e+01  
Na 3.429748e+01 1.809916e+01 3.227269e+01  
Na 3.632227e+01 2.012395e+01 3.227269e+01  
Na 1.809916e+01 2.822311e+01 1.000000e+01  
Na 2.012395e+01 3.024790e+01 1.000000e+01  
Na 1.607437e+01 2.417353e+01 1.202479e+01  
Na 1.809916e+01 2.619832e+01 1.202479e+01  
Na 2.012395e+01 2.822311e+01 1.202479e+01  
Na 2.214874e+01 3.024790e+01 1.202479e+01  
Na 2.417353e+01 3.227269e+01 1.202479e+01  
Na 1.404958e+01 2.012395e+01 1.404958e+01  
Na 1.607437e+01 2.214874e+01 1.404958e+01  
Na 1.809916e+01 2.417353e+01 1.404958e+01  
Na 2.012395e+01 2.619832e+01 1.404958e+01  
Na 2.214874e+01 2.822311e+01 1.404958e+01  
Na 2.417353e+01 3.024790e+01 1.404958e+01  
Na 2.619832e+01 3.227269e+01 1.404958e+01  
Na 2.822311e+01 3.429748e+01 1.404958e+01  
Na 1.404958e+01 1.809916e+01 1.607437e+01  
Na 1.607437e+01 2.012395e+01 1.607437e+01  
Na 1.809916e+01 2.214874e+01 1.607437e+01  
Na 2.012395e+01 2.417353e+01 1.607437e+01



Na 2.214874e+01 2.619832e+01 1.607437e+01  
Na 2.417353e+01 2.822311e+01 1.607437e+01  
Na 2.619832e+01 3.024790e+01 1.607437e+01  
Na 2.822311e+01 3.227269e+01 1.607437e+01  
Na 3.024790e+01 3.429748e+01 1.607437e+01  
Na 1.404958e+01 1.607437e+01 1.809916e+01  
Na 1.607437e+01 1.809916e+01 1.809916e+01  
Na 1.809916e+01 2.012395e+01 1.809916e+01  
Na 2.012395e+01 2.214874e+01 1.809916e+01  
Na 2.214874e+01 2.417353e+01 1.809916e+01  
Na 2.417353e+01 2.619832e+01 1.809916e+01  
Na 2.619832e+01 2.822311e+01 1.809916e+01  
Na 2.822311e+01 3.024790e+01 1.809916e+01  
Na 3.024790e+01 3.227269e+01 1.809916e+01  
Na 3.227269e+01 3.429748e+01 1.809916e+01  
Na 1.404958e+01 1.404958e+01 2.012395e+01  
Na 1.607437e+01 1.607437e+01 2.012395e+01  
Na 1.809916e+01 1.809916e+01 2.012395e+01  
Na 2.012395e+01 2.012395e+01 2.012395e+01  
Na 2.214874e+01 2.214874e+01 2.012395e+01  
Na 2.417353e+01 2.417353e+01 2.012395e+01  
Na 2.619832e+01 2.619832e+01 2.012395e+01  
Na 2.822311e+01 2.822311e+01 2.012395e+01  
Na 3.024790e+01 3.024790e+01 2.012395e+01  
Na 3.227269e+01 3.227269e+01 2.012395e+01  
Na 3.429748e+01 3.429748e+01 2.012395e+01  
Na 1.607437e+01 1.404958e+01 2.214874e+01  
Na 1.809916e+01 1.607437e+01 2.214874e+01  
Na 2.012395e+01 1.809916e+01 2.214874e+01  
Na 2.214874e+01 2.012395e+01 2.214874e+01  
Na 2.417353e+01 2.214874e+01 2.214874e+01  
Na 2.619832e+01 2.417353e+01 2.214874e+01  
Na 2.822311e+01 2.619832e+01 2.214874e+01

Na 3.024790e+01 2.822311e+01 2.214874e+01  
Na 3.227269e+01 3.024790e+01 2.214874e+01  
Na 3.429748e+01 3.227269e+01 2.214874e+01  
Na 1.607437e+01 1.202479e+01 2.417353e+01  
Na 1.809916e+01 1.404958e+01 2.417353e+01  
Na 2.012395e+01 1.607437e+01 2.417353e+01  
Na 2.214874e+01 1.809916e+01 2.417353e+01  
Na 2.417353e+01 2.012395e+01 2.417353e+01  
Na 2.619832e+01 2.214874e+01 2.417353e+01  
Na 2.822311e+01 2.417353e+01 2.417353e+01  
Na 3.024790e+01 2.619832e+01 2.417353e+01  
Na 3.227269e+01 2.822311e+01 2.417353e+01  
Na 3.429748e+01 3.024790e+01 2.417353e+01  
Na 3.632227e+01 3.227269e+01 2.417353e+01  
Na 1.809916e+01 1.202479e+01 2.619832e+01  
Na 2.012395e+01 1.404958e+01 2.619832e+01  
Na 2.214874e+01 1.607437e+01 2.619832e+01  
Na 2.417353e+01 1.809916e+01 2.619832e+01  
Na 2.619832e+01 2.012395e+01 2.619832e+01  
Na 2.822311e+01 2.214874e+01 2.619832e+01  
Na 3.024790e+01 2.417353e+01 2.619832e+01  
Na 3.227269e+01 2.619832e+01 2.619832e+01  
Na 3.429748e+01 2.822311e+01 2.619832e+01  
Na 3.632227e+01 3.024790e+01 2.619832e+01  
Na 1.809916e+01 1.000000e+01 2.822311e+01  
Na 2.012395e+01 1.202479e+01 2.822311e+01  
Na 2.214874e+01 1.404958e+01 2.822311e+01  
Na 2.417353e+01 1.607437e+01 2.822311e+01  
Na 2.619832e+01 1.809916e+01 2.822311e+01  
Na 2.822311e+01 2.012395e+01 2.822311e+01  
Na 3.024790e+01 2.214874e+01 2.822311e+01  
Na 3.227269e+01 2.417353e+01 2.822311e+01  
Na 3.429748e+01 2.619832e+01 2.822311e+01

Na 3.632227e+01 2.822311e+01 2.822311e+01  
Na 3.834706e+01 3.024790e+01 2.822311e+01  
Na 2.012395e+01 1.000000e+01 3.024790e+01  
Na 2.214874e+01 1.202479e+01 3.024790e+01  
Na 2.417353e+01 1.404958e+01 3.024790e+01  
Na 2.619832e+01 1.607437e+01 3.024790e+01  
Na 2.822311e+01 1.809916e+01 3.024790e+01  
Na 3.024790e+01 2.012395e+01 3.024790e+01  
Na 3.227269e+01 2.214874e+01 3.024790e+01  
Na 3.429748e+01 2.417353e+01 3.024790e+01  
Na 3.632227e+01 2.619832e+01 3.024790e+01  
Na 3.834706e+01 2.822311e+01 3.024790e+01  
Na 2.417353e+01 1.202479e+01 3.227269e+01  
Na 2.619832e+01 1.404958e+01 3.227269e+01  
Na 2.822311e+01 1.607437e+01 3.227269e+01  
Na 3.024790e+01 1.809916e+01 3.227269e+01  
Na 3.227269e+01 2.012395e+01 3.227269e+01  
Na 3.429748e+01 2.214874e+01 3.227269e+01  
Na 3.632227e+01 2.417353e+01 3.227269e+01  
Na 2.822311e+01 1.404958e+01 3.429748e+01  
Na 3.024790e+01 1.607437e+01 3.429748e+01  
Na 3.227269e+01 1.809916e+01 3.429748e+01  
Na 3.429748e+01 2.012395e+01 3.429748e+01  
Na 1.607437e+01 2.822311e+01 1.202479e+01  
Na 1.809916e+01 3.024790e+01 1.202479e+01  
Na 2.012395e+01 3.227269e+01 1.202479e+01  
Na 1.404958e+01 2.417353e+01 1.404958e+01  
Na 1.607437e+01 2.619832e+01 1.404958e+01  
Na 1.809916e+01 2.822311e+01 1.404958e+01  
Na 2.012395e+01 3.024790e+01 1.404958e+01  
Na 2.214874e+01 3.227269e+01 1.404958e+01  
Na 2.417353e+01 3.429748e+01 1.404958e+01  
Na 1.202479e+01 2.012395e+01 1.607437e+01

Na 1.404958e+01 2.214874e+01 1.607437e+01  
Na 1.607437e+01 2.417353e+01 1.607437e+01  
Na 1.809916e+01 2.619832e+01 1.607437e+01  
Na 2.012395e+01 2.822311e+01 1.607437e+01  
Na 2.214874e+01 3.024790e+01 1.607437e+01  
Na 2.417353e+01 3.227269e+01 1.607437e+01  
Na 2.619832e+01 3.429748e+01 1.607437e+01  
Na 2.822311e+01 3.632227e+01 1.607437e+01  
Na 1.202479e+01 1.809916e+01 1.809916e+01  
Na 1.404958e+01 2.012395e+01 1.809916e+01  
Na 1.607437e+01 2.214874e+01 1.809916e+01  
Na 1.809916e+01 2.417353e+01 1.809916e+01  
Na 2.012395e+01 2.619832e+01 1.809916e+01  
Na 2.214874e+01 2.822311e+01 1.809916e+01  
Na 2.417353e+01 3.024790e+01 1.809916e+01  
Na 2.619832e+01 3.227269e+01 1.809916e+01  
Na 2.822311e+01 3.429748e+01 1.809916e+01  
Na 3.024790e+01 3.632227e+01 1.809916e+01  
Na 1.202479e+01 1.607437e+01 2.012395e+01  
Na 1.404958e+01 1.809916e+01 2.012395e+01  
Na 1.607437e+01 2.012395e+01 2.012395e+01  
Na 1.809916e+01 2.214874e+01 2.012395e+01  
Na 2.012395e+01 2.417353e+01 2.012395e+01  
Na 2.214874e+01 2.619832e+01 2.012395e+01  
Na 2.417353e+01 2.822311e+01 2.012395e+01  
Na 2.619832e+01 3.024790e+01 2.012395e+01  
Na 2.822311e+01 3.227269e+01 2.012395e+01  
Na 3.024790e+01 3.429748e+01 2.012395e+01  
Na 3.227269e+01 3.632227e+01 2.012395e+01  
Na 1.404958e+01 1.607437e+01 2.214874e+01  
Na 1.607437e+01 1.809916e+01 2.214874e+01  
Na 1.809916e+01 2.012395e+01 2.214874e+01  
Na 2.012395e+01 2.214874e+01 2.214874e+01

Na 2.214874e+01 2.417353e+01 2.214874e+01  
Na 2.417353e+01 2.619832e+01 2.214874e+01  
Na 2.619832e+01 2.822311e+01 2.214874e+01  
Na 2.822311e+01 3.024790e+01 2.214874e+01  
Na 3.024790e+01 3.227269e+01 2.214874e+01  
Na 3.227269e+01 3.429748e+01 2.214874e+01  
Na 1.404958e+01 1.404958e+01 2.417353e+01  
Na 1.607437e+01 1.607437e+01 2.417353e+01  
Na 1.809916e+01 1.809916e+01 2.417353e+01  
Na 2.012395e+01 2.012395e+01 2.417353e+01  
Na 2.214874e+01 2.214874e+01 2.417353e+01  
Na 2.417353e+01 2.417353e+01 2.417353e+01  
Na 2.619832e+01 2.619832e+01 2.417353e+01  
Na 2.822311e+01 2.822311e+01 2.417353e+01  
Na 3.024790e+01 3.024790e+01 2.417353e+01  
Na 3.227269e+01 3.227269e+01 2.417353e+01  
Na 3.429748e+01 3.429748e+01 2.417353e+01  
Na 1.607437e+01 1.404958e+01 2.619832e+01  
Na 1.809916e+01 1.607437e+01 2.619832e+01  
Na 2.012395e+01 1.809916e+01 2.619832e+01  
Na 2.214874e+01 2.012395e+01 2.619832e+01  
Na 2.417353e+01 2.214874e+01 2.619832e+01  
Na 2.619832e+01 2.417353e+01 2.619832e+01  
Na 2.822311e+01 2.619832e+01 2.619832e+01  
Na 3.024790e+01 2.822311e+01 2.619832e+01  
Na 3.227269e+01 3.024790e+01 2.619832e+01  
Na 3.429748e+01 3.227269e+01 2.619832e+01  
Na 1.607437e+01 1.202479e+01 2.822311e+01  
Na 1.809916e+01 1.404958e+01 2.822311e+01  
Na 2.012395e+01 1.607437e+01 2.822311e+01  
Na 2.214874e+01 1.809916e+01 2.822311e+01  
Na 2.417353e+01 2.012395e+01 2.822311e+01  
Na 2.619832e+01 2.214874e+01 2.822311e+01

Na 2.822311e+01 2.417353e+01 2.822311e+01  
Na 3.024790e+01 2.619832e+01 2.822311e+01  
Na 3.227269e+01 2.822311e+01 2.822311e+01  
Na 3.429748e+01 3.024790e+01 2.822311e+01  
Na 3.632227e+01 3.227269e+01 2.822311e+01  
Na 1.809916e+01 1.202479e+01 3.024790e+01  
Na 2.012395e+01 1.404958e+01 3.024790e+01  
Na 2.214874e+01 1.607437e+01 3.024790e+01  
Na 2.417353e+01 1.809916e+01 3.024790e+01  
Na 2.619832e+01 2.012395e+01 3.024790e+01  
Na 2.822311e+01 2.214874e+01 3.024790e+01  
Na 3.024790e+01 2.417353e+01 3.024790e+01  
Na 3.227269e+01 2.619832e+01 3.024790e+01  
Na 3.429748e+01 2.822311e+01 3.024790e+01  
Na 3.632227e+01 3.024790e+01 3.024790e+01  
Na 2.012395e+01 1.202479e+01 3.227269e+01  
Na 2.214874e+01 1.404958e+01 3.227269e+01  
Na 2.417353e+01 1.607437e+01 3.227269e+01  
Na 2.619832e+01 1.809916e+01 3.227269e+01  
Na 2.822311e+01 2.012395e+01 3.227269e+01  
Na 3.024790e+01 2.214874e+01 3.227269e+01  
Na 3.227269e+01 2.417353e+01 3.227269e+01  
Na 3.429748e+01 2.619832e+01 3.227269e+01  
Na 3.632227e+01 2.822311e+01 3.227269e+01  
Na 2.417353e+01 1.404958e+01 3.429748e+01  
Na 2.619832e+01 1.607437e+01 3.429748e+01  
Na 2.822311e+01 1.809916e+01 3.429748e+01  
Na 3.024790e+01 2.012395e+01 3.429748e+01  
Na 3.227269e+01 2.214874e+01 3.429748e+01  
Na 3.429748e+01 2.417353e+01 3.429748e+01  
Na 2.822311e+01 1.607437e+01 3.632227e+01  
Na 3.024790e+01 1.809916e+01 3.632227e+01  
Na 3.227269e+01 2.012395e+01 3.632227e+01

Na 1.404958e+01 2.822311e+01 1.404958e+01  
Na 1.607437e+01 3.024790e+01 1.404958e+01  
Na 1.809916e+01 3.227269e+01 1.404958e+01  
Na 2.012395e+01 3.429748e+01 1.404958e+01  
Na 1.202479e+01 2.417353e+01 1.607437e+01  
Na 1.404958e+01 2.619832e+01 1.607437e+01  
Na 1.607437e+01 2.822311e+01 1.607437e+01  
Na 1.809916e+01 3.024790e+01 1.607437e+01  
Na 2.012395e+01 3.227269e+01 1.607437e+01  
Na 2.214874e+01 3.429748e+01 1.607437e+01  
Na 2.417353e+01 3.632227e+01 1.607437e+01  
Na 1.000000e+01 2.012395e+01 1.809916e+01  
Na 1.202479e+01 2.214874e+01 1.809916e+01  
Na 1.404958e+01 2.417353e+01 1.809916e+01  
Na 1.607437e+01 2.619832e+01 1.809916e+01  
Na 1.809916e+01 2.822311e+01 1.809916e+01  
Na 2.012395e+01 3.024790e+01 1.809916e+01  
Na 2.214874e+01 3.227269e+01 1.809916e+01  
Na 2.417353e+01 3.429748e+01 1.809916e+01  
Na 2.619832e+01 3.632227e+01 1.809916e+01  
Na 2.822311e+01 3.834706e+01 1.809916e+01  
Na 1.000000e+01 1.809916e+01 2.012395e+01  
Na 1.202479e+01 2.012395e+01 2.012395e+01  
Na 1.404958e+01 2.214874e+01 2.012395e+01  
Na 1.607437e+01 2.417353e+01 2.012395e+01  
Na 1.809916e+01 2.619832e+01 2.012395e+01  
Na 2.012395e+01 2.822311e+01 2.012395e+01  
Na 2.214874e+01 3.024790e+01 2.012395e+01  
Na 2.417353e+01 3.227269e+01 2.012395e+01  
Na 2.619832e+01 3.429748e+01 2.012395e+01  
Na 2.822311e+01 3.632227e+01 2.012395e+01  
Na 3.024790e+01 3.834706e+01 2.012395e+01  
Na 1.202479e+01 1.809916e+01 2.214874e+01

Na 1.404958e+01 2.012395e+01 2.214874e+01  
Na 1.607437e+01 2.214874e+01 2.214874e+01  
Na 1.809916e+01 2.417353e+01 2.214874e+01  
Na 2.012395e+01 2.619832e+01 2.214874e+01  
Na 2.214874e+01 2.822311e+01 2.214874e+01  
Na 2.417353e+01 3.024790e+01 2.214874e+01  
Na 2.619832e+01 3.227269e+01 2.214874e+01  
Na 2.822311e+01 3.429748e+01 2.214874e+01  
Na 3.024790e+01 3.632227e+01 2.214874e+01  
Na 1.202479e+01 1.607437e+01 2.417353e+01  
Na 1.404958e+01 1.809916e+01 2.417353e+01  
Na 1.607437e+01 2.012395e+01 2.417353e+01  
Na 1.809916e+01 2.214874e+01 2.417353e+01  
Na 2.012395e+01 2.417353e+01 2.417353e+01  
Na 2.214874e+01 2.619832e+01 2.417353e+01  
Na 2.417353e+01 2.822311e+01 2.417353e+01  
Na 2.619832e+01 3.024790e+01 2.417353e+01  
Na 2.822311e+01 3.227269e+01 2.417353e+01  
Na 3.024790e+01 3.429748e+01 2.417353e+01  
Na 3.227269e+01 3.632227e+01 2.417353e+01  
Na 1.404958e+01 1.607437e+01 2.619832e+01  
Na 1.607437e+01 1.809916e+01 2.619832e+01  
Na 1.809916e+01 2.012395e+01 2.619832e+01  
Na 2.012395e+01 2.214874e+01 2.619832e+01  
Na 2.214874e+01 2.417353e+01 2.619832e+01  
Na 2.417353e+01 2.619832e+01 2.619832e+01  
Na 2.619832e+01 2.822311e+01 2.619832e+01  
Na 2.822311e+01 3.024790e+01 2.619832e+01  
Na 3.024790e+01 3.227269e+01 2.619832e+01  
Na 3.227269e+01 3.429748e+01 2.619832e+01  
Na 1.404958e+01 1.404958e+01 2.822311e+01  
Na 1.607437e+01 1.607437e+01 2.822311e+01  
Na 1.809916e+01 1.809916e+01 2.822311e+01



Na 2.012395e+01 2.012395e+01 2.822311e+01  
Na 2.214874e+01 2.214874e+01 2.822311e+01  
Na 2.417353e+01 2.417353e+01 2.822311e+01  
Na 2.619832e+01 2.619832e+01 2.822311e+01  
Na 2.822311e+01 2.822311e+01 2.822311e+01  
Na 3.024790e+01 3.024790e+01 2.822311e+01  
Na 3.227269e+01 3.227269e+01 2.822311e+01  
Na 3.429748e+01 3.429748e+01 2.822311e+01  
Na 1.607437e+01 1.404958e+01 3.024790e+01  
Na 1.809916e+01 1.607437e+01 3.024790e+01  
Na 2.012395e+01 1.809916e+01 3.024790e+01  
Na 2.214874e+01 2.012395e+01 3.024790e+01  
Na 2.417353e+01 2.214874e+01 3.024790e+01  
Na 2.619832e+01 2.417353e+01 3.024790e+01  
Na 2.822311e+01 2.619832e+01 3.024790e+01  
Na 3.024790e+01 2.822311e+01 3.024790e+01  
Na 3.227269e+01 3.024790e+01 3.024790e+01  
Na 3.429748e+01 3.227269e+01 3.024790e+01  
Na 1.809916e+01 1.404958e+01 3.227269e+01  
Na 2.012395e+01 1.607437e+01 3.227269e+01  
Na 2.214874e+01 1.809916e+01 3.227269e+01  
Na 2.417353e+01 2.012395e+01 3.227269e+01  
Na 2.619832e+01 2.214874e+01 3.227269e+01  
Na 2.822311e+01 2.417353e+01 3.227269e+01  
Na 3.024790e+01 2.619832e+01 3.227269e+01  
Na 3.227269e+01 2.822311e+01 3.227269e+01  
Na 3.429748e+01 3.024790e+01 3.227269e+01  
Na 2.012395e+01 1.404958e+01 3.429748e+01  
Na 2.214874e+01 1.607437e+01 3.429748e+01  
Na 2.417353e+01 1.809916e+01 3.429748e+01  
Na 2.619832e+01 2.012395e+01 3.429748e+01  
Na 2.822311e+01 2.214874e+01 3.429748e+01  
Na 3.024790e+01 2.417353e+01 3.429748e+01

Na 3.227269e+01 2.619832e+01 3.429748e+01  
Na 3.429748e+01 2.822311e+01 3.429748e+01  
Na 2.417353e+01 1.607437e+01 3.632227e+01  
Na 2.619832e+01 1.809916e+01 3.632227e+01  
Na 2.822311e+01 2.012395e+01 3.632227e+01  
Na 3.024790e+01 2.214874e+01 3.632227e+01  
Na 3.227269e+01 2.417353e+01 3.632227e+01  
Na 2.822311e+01 1.809916e+01 3.834706e+01  
Na 3.024790e+01 2.012395e+01 3.834706e+01  
Na 1.202479e+01 2.822311e+01 1.607437e+01  
Na 1.404958e+01 3.024790e+01 1.607437e+01  
Na 1.607437e+01 3.227269e+01 1.607437e+01  
Na 1.809916e+01 3.429748e+01 1.607437e+01  
Na 2.012395e+01 3.632227e+01 1.607437e+01  
Na 1.000000e+01 2.417353e+01 1.809916e+01  
Na 1.202479e+01 2.619832e+01 1.809916e+01  
Na 1.404958e+01 2.822311e+01 1.809916e+01  
Na 1.607437e+01 3.024790e+01 1.809916e+01  
Na 1.809916e+01 3.227269e+01 1.809916e+01  
Na 2.012395e+01 3.429748e+01 1.809916e+01  
Na 2.214874e+01 3.632227e+01 1.809916e+01  
Na 2.417353e+01 3.834706e+01 1.809916e+01  
Na 1.000000e+01 2.214874e+01 2.012395e+01  
Na 1.202479e+01 2.417353e+01 2.012395e+01  
Na 1.404958e+01 2.619832e+01 2.012395e+01  
Na 1.607437e+01 2.822311e+01 2.012395e+01  
Na 1.809916e+01 3.024790e+01 2.012395e+01  
Na 2.012395e+01 3.227269e+01 2.012395e+01  
Na 2.214874e+01 3.429748e+01 2.012395e+01  
Na 2.417353e+01 3.632227e+01 2.012395e+01  
Na 2.619832e+01 3.834706e+01 2.012395e+01  
Na 1.000000e+01 2.012395e+01 2.214874e+01  
Na 1.202479e+01 2.214874e+01 2.214874e+01

Na 1.404958e+01 2.417353e+01 2.214874e+01  
Na 1.607437e+01 2.619832e+01 2.214874e+01  
Na 1.809916e+01 2.822311e+01 2.214874e+01  
Na 2.012395e+01 3.024790e+01 2.214874e+01  
Na 2.214874e+01 3.227269e+01 2.214874e+01  
Na 2.417353e+01 3.429748e+01 2.214874e+01  
Na 2.619832e+01 3.632227e+01 2.214874e+01  
Na 2.822311e+01 3.834706e+01 2.214874e+01  
Na 1.000000e+01 1.809916e+01 2.417353e+01  
Na 1.202479e+01 2.012395e+01 2.417353e+01  
Na 1.404958e+01 2.214874e+01 2.417353e+01  
Na 1.607437e+01 2.417353e+01 2.417353e+01  
Na 1.809916e+01 2.619832e+01 2.417353e+01  
Na 2.012395e+01 2.822311e+01 2.417353e+01  
Na 2.214874e+01 3.024790e+01 2.417353e+01  
Na 2.417353e+01 3.227269e+01 2.417353e+01  
Na 2.619832e+01 3.429748e+01 2.417353e+01  
Na 2.822311e+01 3.632227e+01 2.417353e+01  
Na 3.024790e+01 3.834706e+01 2.417353e+01  
Na 1.202479e+01 1.809916e+01 2.619832e+01  
Na 1.404958e+01 2.012395e+01 2.619832e+01  
Na 1.607437e+01 2.214874e+01 2.619832e+01  
Na 1.809916e+01 2.417353e+01 2.619832e+01  
Na 2.012395e+01 2.619832e+01 2.619832e+01  
Na 2.214874e+01 2.822311e+01 2.619832e+01  
Na 2.417353e+01 3.024790e+01 2.619832e+01  
Na 2.619832e+01 3.227269e+01 2.619832e+01  
Na 2.822311e+01 3.429748e+01 2.619832e+01  
Na 3.024790e+01 3.632227e+01 2.619832e+01  
Na 1.202479e+01 1.607437e+01 2.822311e+01  
Na 1.404958e+01 1.809916e+01 2.822311e+01  
Na 1.607437e+01 2.012395e+01 2.822311e+01  
Na 1.809916e+01 2.214874e+01 2.822311e+01

Na 2.012395e+01 2.417353e+01 2.822311e+01  
Na 2.214874e+01 2.619832e+01 2.822311e+01  
Na 2.417353e+01 2.822311e+01 2.822311e+01  
Na 2.619832e+01 3.024790e+01 2.822311e+01  
Na 2.822311e+01 3.227269e+01 2.822311e+01  
Na 3.024790e+01 3.429748e+01 2.822311e+01  
Na 3.227269e+01 3.632227e+01 2.822311e+01  
Na 1.404958e+01 1.607437e+01 3.024790e+01  
Na 1.607437e+01 1.809916e+01 3.024790e+01  
Na 1.809916e+01 2.012395e+01 3.024790e+01  
Na 2.012395e+01 2.214874e+01 3.024790e+01  
Na 2.214874e+01 2.417353e+01 3.024790e+01  
Na 2.417353e+01 2.619832e+01 3.024790e+01  
Na 2.619832e+01 2.822311e+01 3.024790e+01  
Na 2.822311e+01 3.024790e+01 3.024790e+01  
Na 3.024790e+01 3.227269e+01 3.024790e+01  
Na 3.227269e+01 3.429748e+01 3.024790e+01  
Na 1.607437e+01 1.607437e+01 3.227269e+01  
Na 1.809916e+01 1.809916e+01 3.227269e+01  
Na 2.012395e+01 2.012395e+01 3.227269e+01  
Na 2.214874e+01 2.214874e+01 3.227269e+01  
Na 2.417353e+01 2.417353e+01 3.227269e+01  
Na 2.619832e+01 2.619832e+01 3.227269e+01  
Na 2.822311e+01 2.822311e+01 3.227269e+01  
Na 3.024790e+01 3.024790e+01 3.227269e+01  
Na 3.227269e+01 3.227269e+01 3.227269e+01  
Na 1.809916e+01 1.607437e+01 3.429748e+01  
Na 2.012395e+01 1.809916e+01 3.429748e+01  
Na 2.214874e+01 2.012395e+01 3.429748e+01  
Na 2.417353e+01 2.214874e+01 3.429748e+01  
Na 2.619832e+01 2.417353e+01 3.429748e+01  
Na 2.822311e+01 2.619832e+01 3.429748e+01  
Na 3.024790e+01 2.822311e+01 3.429748e+01

Na 3.227269e+01 3.024790e+01 3.429748e+01  
Na 2.012395e+01 1.607437e+01 3.632227e+01  
Na 2.214874e+01 1.809916e+01 3.632227e+01  
Na 2.417353e+01 2.012395e+01 3.632227e+01  
Na 2.619832e+01 2.214874e+01 3.632227e+01  
Na 2.822311e+01 2.417353e+01 3.632227e+01  
Na 3.024790e+01 2.619832e+01 3.632227e+01  
Na 3.227269e+01 2.822311e+01 3.632227e+01  
Na 2.417353e+01 1.809916e+01 3.834706e+01  
Na 2.619832e+01 2.012395e+01 3.834706e+01  
Na 2.822311e+01 2.214874e+01 3.834706e+01  
Na 3.024790e+01 2.417353e+01 3.834706e+01  
Na 1.000000e+01 2.822311e+01 1.809916e+01  
Na 1.202479e+01 3.024790e+01 1.809916e+01  
Na 1.404958e+01 3.227269e+01 1.809916e+01  
Na 1.607437e+01 3.429748e+01 1.809916e+01  
Na 1.809916e+01 3.632227e+01 1.809916e+01  
Na 2.012395e+01 3.834706e+01 1.809916e+01  
Na 1.000000e+01 2.619832e+01 2.012395e+01  
Na 1.202479e+01 2.822311e+01 2.012395e+01  
Na 1.404958e+01 3.024790e+01 2.012395e+01  
Na 1.607437e+01 3.227269e+01 2.012395e+01  
Na 1.809916e+01 3.429748e+01 2.012395e+01  
Na 2.012395e+01 3.632227e+01 2.012395e+01  
Na 2.214874e+01 3.834706e+01 2.012395e+01  
Na 1.000000e+01 2.417353e+01 2.214874e+01  
Na 1.202479e+01 2.619832e+01 2.214874e+01  
Na 1.404958e+01 2.822311e+01 2.214874e+01  
Na 1.607437e+01 3.024790e+01 2.214874e+01  
Na 1.809916e+01 3.227269e+01 2.214874e+01  
Na 2.012395e+01 3.429748e+01 2.214874e+01  
Na 2.214874e+01 3.632227e+01 2.214874e+01  
Na 2.417353e+01 3.834706e+01 2.214874e+01

Na 1.000000e+01 2.214874e+01 2.417353e+01  
Na 1.202479e+01 2.417353e+01 2.417353e+01  
Na 1.404958e+01 2.619832e+01 2.417353e+01  
Na 1.607437e+01 2.822311e+01 2.417353e+01  
Na 1.809916e+01 3.024790e+01 2.417353e+01  
Na 2.012395e+01 3.227269e+01 2.417353e+01  
Na 2.214874e+01 3.429748e+01 2.417353e+01  
Na 2.417353e+01 3.632227e+01 2.417353e+01  
Na 2.619832e+01 3.834706e+01 2.417353e+01  
Na 1.000000e+01 2.012395e+01 2.619832e+01  
Na 1.202479e+01 2.214874e+01 2.619832e+01  
Na 1.404958e+01 2.417353e+01 2.619832e+01  
Na 1.607437e+01 2.619832e+01 2.619832e+01  
Na 1.809916e+01 2.822311e+01 2.619832e+01  
Na 2.012395e+01 3.024790e+01 2.619832e+01  
Na 2.214874e+01 3.227269e+01 2.619832e+01  
Na 2.417353e+01 3.429748e+01 2.619832e+01  
Na 2.619832e+01 3.632227e+01 2.619832e+01  
Na 2.822311e+01 3.834706e+01 2.619832e+01  
Na 1.000000e+01 1.809916e+01 2.822311e+01  
Na 1.202479e+01 2.012395e+01 2.822311e+01  
Na 1.404958e+01 2.214874e+01 2.822311e+01  
Na 1.607437e+01 2.417353e+01 2.822311e+01  
Na 1.809916e+01 2.619832e+01 2.822311e+01  
Na 2.012395e+01 2.822311e+01 2.822311e+01  
Na 2.214874e+01 3.024790e+01 2.822311e+01  
Na 2.417353e+01 3.227269e+01 2.822311e+01  
Na 2.619832e+01 3.429748e+01 2.822311e+01  
Na 2.822311e+01 3.632227e+01 2.822311e+01  
Na 3.024790e+01 3.834706e+01 2.822311e+01  
Na 1.202479e+01 1.809916e+01 3.024790e+01  
Na 1.404958e+01 2.012395e+01 3.024790e+01  
Na 1.607437e+01 2.214874e+01 3.024790e+01

Na 1.809916e+01 2.417353e+01 3.024790e+01  
Na 2.012395e+01 2.619832e+01 3.024790e+01  
Na 2.214874e+01 2.822311e+01 3.024790e+01  
Na 2.417353e+01 3.024790e+01 3.024790e+01  
Na 2.619832e+01 3.227269e+01 3.024790e+01  
Na 2.822311e+01 3.429748e+01 3.024790e+01  
Na 3.024790e+01 3.632227e+01 3.024790e+01  
Na 1.404958e+01 1.809916e+01 3.227269e+01  
Na 1.607437e+01 2.012395e+01 3.227269e+01  
Na 1.809916e+01 2.214874e+01 3.227269e+01  
Na 2.012395e+01 2.417353e+01 3.227269e+01  
Na 2.214874e+01 2.619832e+01 3.227269e+01  
Na 2.417353e+01 2.822311e+01 3.227269e+01  
Na 2.619832e+01 3.024790e+01 3.227269e+01  
Na 2.822311e+01 3.227269e+01 3.227269e+01  
Na 3.024790e+01 3.429748e+01 3.227269e+01  
Na 1.607437e+01 1.809916e+01 3.429748e+01  
Na 1.809916e+01 2.012395e+01 3.429748e+01  
Na 2.012395e+01 2.214874e+01 3.429748e+01  
Na 2.214874e+01 2.417353e+01 3.429748e+01  
Na 2.417353e+01 2.619832e+01 3.429748e+01  
Na 2.619832e+01 2.822311e+01 3.429748e+01  
Na 2.822311e+01 3.024790e+01 3.429748e+01  
Na 3.024790e+01 3.227269e+01 3.429748e+01  
Na 1.809916e+01 1.809916e+01 3.632227e+01  
Na 2.012395e+01 2.012395e+01 3.632227e+01  
Na 2.214874e+01 2.214874e+01 3.632227e+01  
Na 2.417353e+01 2.417353e+01 3.632227e+01  
Na 2.619832e+01 2.619832e+01 3.632227e+01  
Na 2.822311e+01 2.822311e+01 3.632227e+01  
Na 3.024790e+01 3.024790e+01 3.632227e+01  
Na 2.012395e+01 1.809916e+01 3.834706e+01  
Na 2.214874e+01 2.012395e+01 3.834706e+01

Na 2.417353e+01 2.214874e+01 3.834706e+01  
Na 2.619832e+01 2.417353e+01 3.834706e+01  
Na 2.822311e+01 2.619832e+01 3.834706e+01  
Na 3.024790e+01 2.822311e+01 3.834706e+01  
Na 1.000000e+01 3.024790e+01 2.012395e+01  
Na 1.202479e+01 3.227269e+01 2.012395e+01  
Na 1.404958e+01 3.429748e+01 2.012395e+01  
Na 1.607437e+01 3.632227e+01 2.012395e+01  
Na 1.809916e+01 3.834706e+01 2.012395e+01  
Na 1.000000e+01 2.822311e+01 2.214874e+01  
Na 1.202479e+01 3.024790e+01 2.214874e+01  
Na 1.404958e+01 3.227269e+01 2.214874e+01  
Na 1.607437e+01 3.429748e+01 2.214874e+01  
Na 1.809916e+01 3.632227e+01 2.214874e+01  
Na 2.012395e+01 3.834706e+01 2.214874e+01  
Na 1.000000e+01 2.619832e+01 2.417353e+01  
Na 1.202479e+01 2.822311e+01 2.417353e+01  
Na 1.404958e+01 3.024790e+01 2.417353e+01  
Na 1.607437e+01 3.227269e+01 2.417353e+01  
Na 1.809916e+01 3.429748e+01 2.417353e+01  
Na 2.012395e+01 3.632227e+01 2.417353e+01  
Na 2.214874e+01 3.834706e+01 2.417353e+01  
Na 1.000000e+01 2.417353e+01 2.619832e+01  
Na 1.202479e+01 2.619832e+01 2.619832e+01  
Na 1.404958e+01 2.822311e+01 2.619832e+01  
Na 1.607437e+01 3.024790e+01 2.619832e+01  
Na 1.809916e+01 3.227269e+01 2.619832e+01  
Na 2.012395e+01 3.429748e+01 2.619832e+01  
Na 2.214874e+01 3.632227e+01 2.619832e+01  
Na 2.417353e+01 3.834706e+01 2.619832e+01  
Na 1.000000e+01 2.214874e+01 2.822311e+01  
Na 1.202479e+01 2.417353e+01 2.822311e+01  
Na 1.404958e+01 2.619832e+01 2.822311e+01



Na 1.607437e+01 2.822311e+01 2.822311e+01  
Na 1.809916e+01 3.024790e+01 2.822311e+01  
Na 2.012395e+01 3.227269e+01 2.822311e+01  
Na 2.214874e+01 3.429748e+01 2.822311e+01  
Na 2.417353e+01 3.632227e+01 2.822311e+01  
Na 2.619832e+01 3.834706e+01 2.822311e+01  
Na 1.000000e+01 2.012395e+01 3.024790e+01  
Na 1.202479e+01 2.214874e+01 3.024790e+01  
Na 1.404958e+01 2.417353e+01 3.024790e+01  
Na 1.607437e+01 2.619832e+01 3.024790e+01  
Na 1.809916e+01 2.822311e+01 3.024790e+01  
Na 2.012395e+01 3.024790e+01 3.024790e+01  
Na 2.214874e+01 3.227269e+01 3.024790e+01  
Na 2.417353e+01 3.429748e+01 3.024790e+01  
Na 2.619832e+01 3.632227e+01 3.024790e+01  
Na 2.822311e+01 3.834706e+01 3.024790e+01  
Na 1.202479e+01 2.012395e+01 3.227269e+01  
Na 1.404958e+01 2.214874e+01 3.227269e+01  
Na 1.607437e+01 2.417353e+01 3.227269e+01  
Na 1.809916e+01 2.619832e+01 3.227269e+01  
Na 2.012395e+01 2.822311e+01 3.227269e+01  
Na 2.214874e+01 3.024790e+01 3.227269e+01  
Na 2.417353e+01 3.227269e+01 3.227269e+01  
Na 2.619832e+01 3.429748e+01 3.227269e+01  
Na 2.822311e+01 3.632227e+01 3.227269e+01  
Na 1.404958e+01 2.012395e+01 3.429748e+01  
Na 1.607437e+01 2.214874e+01 3.429748e+01  
Na 1.809916e+01 2.417353e+01 3.429748e+01  
Na 2.012395e+01 2.619832e+01 3.429748e+01  
Na 2.214874e+01 2.822311e+01 3.429748e+01  
Na 2.417353e+01 3.024790e+01 3.429748e+01  
Na 2.619832e+01 3.227269e+01 3.429748e+01  
Na 2.822311e+01 3.429748e+01 3.429748e+01

Na 1.607437e+01 2.012395e+01 3.632227e+01  
Na 1.809916e+01 2.214874e+01 3.632227e+01  
Na 2.012395e+01 2.417353e+01 3.632227e+01  
Na 2.214874e+01 2.619832e+01 3.632227e+01  
Na 2.417353e+01 2.822311e+01 3.632227e+01  
Na 2.619832e+01 3.024790e+01 3.632227e+01  
Na 2.822311e+01 3.227269e+01 3.632227e+01  
Na 1.809916e+01 2.012395e+01 3.834706e+01  
Na 2.012395e+01 2.214874e+01 3.834706e+01  
Na 2.214874e+01 2.417353e+01 3.834706e+01  
Na 2.417353e+01 2.619832e+01 3.834706e+01  
Na 2.619832e+01 2.822311e+01 3.834706e+01  
Na 2.822311e+01 3.024790e+01 3.834706e+01  
Na 1.000000e+01 3.024790e+01 2.417353e+01  
Na 1.202479e+01 3.227269e+01 2.417353e+01  
Na 1.404958e+01 3.429748e+01 2.417353e+01  
Na 1.607437e+01 3.632227e+01 2.417353e+01  
Na 1.809916e+01 3.834706e+01 2.417353e+01  
Na 1.000000e+01 2.822311e+01 2.619832e+01  
Na 1.202479e+01 3.024790e+01 2.619832e+01  
Na 1.404958e+01 3.227269e+01 2.619832e+01  
Na 1.607437e+01 3.429748e+01 2.619832e+01  
Na 1.809916e+01 3.632227e+01 2.619832e+01  
Na 2.012395e+01 3.834706e+01 2.619832e+01  
Na 1.000000e+01 2.619832e+01 2.822311e+01  
Na 1.202479e+01 2.822311e+01 2.822311e+01  
Na 1.404958e+01 3.024790e+01 2.822311e+01  
Na 1.607437e+01 3.227269e+01 2.822311e+01  
Na 1.809916e+01 3.429748e+01 2.822311e+01  
Na 2.012395e+01 3.632227e+01 2.822311e+01  
Na 2.214874e+01 3.834706e+01 2.822311e+01  
Na 1.000000e+01 2.417353e+01 3.024790e+01  
Na 1.202479e+01 2.619832e+01 3.024790e+01

Na 1.404958e+01 2.822311e+01 3.024790e+01  
Na 1.607437e+01 3.024790e+01 3.024790e+01  
Na 1.809916e+01 3.227269e+01 3.024790e+01  
Na 2.012395e+01 3.429748e+01 3.024790e+01  
Na 2.214874e+01 3.632227e+01 3.024790e+01  
Na 2.417353e+01 3.834706e+01 3.024790e+01  
Na 1.202479e+01 2.417353e+01 3.227269e+01  
Na 1.404958e+01 2.619832e+01 3.227269e+01  
Na 1.607437e+01 2.822311e+01 3.227269e+01  
Na 1.809916e+01 3.024790e+01 3.227269e+01  
Na 2.012395e+01 3.227269e+01 3.227269e+01  
Na 2.214874e+01 3.429748e+01 3.227269e+01  
Na 2.417353e+01 3.632227e+01 3.227269e+01  
Na 1.404958e+01 2.417353e+01 3.429748e+01  
Na 1.607437e+01 2.619832e+01 3.429748e+01  
Na 1.809916e+01 2.822311e+01 3.429748e+01  
Na 2.012395e+01 3.024790e+01 3.429748e+01  
Na 2.214874e+01 3.227269e+01 3.429748e+01  
Na 2.417353e+01 3.429748e+01 3.429748e+01  
Na 1.607437e+01 2.417353e+01 3.632227e+01  
Na 1.809916e+01 2.619832e+01 3.632227e+01  
Na 2.012395e+01 2.822311e+01 3.632227e+01  
Na 2.214874e+01 3.024790e+01 3.632227e+01  
Na 2.417353e+01 3.227269e+01 3.632227e+01  
Na 1.809916e+01 2.417353e+01 3.834706e+01  
Na 2.012395e+01 2.619832e+01 3.834706e+01  
Na 2.214874e+01 2.822311e+01 3.834706e+01  
Na 2.417353e+01 3.024790e+01 3.834706e+01  
Na 1.000000e+01 3.024790e+01 2.822311e+01  
Na 1.202479e+01 3.227269e+01 2.822311e+01  
Na 1.404958e+01 3.429748e+01 2.822311e+01  
Na 1.607437e+01 3.632227e+01 2.822311e+01  
Na 1.809916e+01 3.834706e+01 2.822311e+01

Na 1.000000e+01 2.822311e+01 3.024790e+01  
Na 1.202479e+01 3.024790e+01 3.024790e+01  
Na 1.404958e+01 3.227269e+01 3.024790e+01  
Na 1.607437e+01 3.429748e+01 3.024790e+01  
Na 1.809916e+01 3.632227e+01 3.024790e+01  
Na 2.012395e+01 3.834706e+01 3.024790e+01  
Na 1.202479e+01 2.822311e+01 3.227269e+01  
Na 1.404958e+01 3.024790e+01 3.227269e+01  
Na 1.607437e+01 3.227269e+01 3.227269e+01  
Na 1.809916e+01 3.429748e+01 3.227269e+01  
Na 2.012395e+01 3.632227e+01 3.227269e+01  
Na 1.404958e+01 2.822311e+01 3.429748e+01  
Na 1.607437e+01 3.024790e+01 3.429748e+01  
Na 1.809916e+01 3.227269e+01 3.429748e+01  
Na 2.012395e+01 3.429748e+01 3.429748e+01  
Na 1.607437e+01 2.822311e+01 3.632227e+01  
Na 1.809916e+01 3.024790e+01 3.632227e+01  
Na 2.012395e+01 3.227269e+01 3.632227e+01  
Na 1.809916e+01 2.822311e+01 3.834706e+01  
Na 2.012395e+01 3.024790e+01 3.834706e+01

### **Atomic coordinates of Na 1.25 nm nanoparticle**

Na 4.049580e+00 -4.049580e+00 -1.214874e+01  
Na 4.049580e+00 -6.074370e+00 -1.012395e+01  
Na 6.074370e+00 -4.049580e+00 -1.012395e+01  
Na 4.049580e+00 -8.099160e+00 -8.099160e+00  
Na 6.074370e+00 -6.074370e+00 -8.099160e+00  
Na 8.099160e+00 -4.049580e+00 -8.099160e+00  
Na 4.049580e+00 -1.012395e+01 -6.074370e+00  
Na 6.074370e+00 -8.099160e+00 -6.074370e+00  
Na 8.099160e+00 -6.074370e+00 -6.074370e+00

Na 1.012395e+01 -4.049580e+00 -6.074370e+00  
Na 4.049580e+00 -1.214874e+01 -4.049580e+00  
Na 6.074370e+00 -1.012395e+01 -4.049580e+00  
Na 8.099160e+00 -8.099160e+00 -4.049580e+00  
Na 1.012395e+01 -6.074370e+00 -4.049580e+00  
Na 1.214874e+01 -4.049580e+00 -4.049580e+00  
Na 0.000000e+00 -4.049580e+00 -1.214874e+01  
Na 2.024790e+00 -2.024790e+00 -1.214874e+01  
Na 4.049580e+00 -0.000000e+00 -1.214874e+01  
Na 0.000000e+00 -6.074370e+00 -1.012395e+01  
Na 2.024790e+00 -4.049580e+00 -1.012395e+01  
Na 4.049580e+00 -2.024790e+00 -1.012395e+01  
Na 6.074370e+00 -0.000000e+00 -1.012395e+01  
Na 0.000000e+00 -8.099160e+00 -8.099160e+00  
Na 2.024790e+00 -6.074370e+00 -8.099160e+00  
Na 4.049580e+00 -4.049580e+00 -8.099160e+00  
Na 6.074370e+00 -2.024790e+00 -8.099160e+00  
Na 8.099160e+00 -0.000000e+00 -8.099160e+00  
Na 0.000000e+00 -1.012395e+01 -6.074370e+00  
Na 2.024790e+00 -8.099160e+00 -6.074370e+00  
Na 4.049580e+00 -6.074370e+00 -6.074370e+00  
Na 6.074370e+00 -4.049580e+00 -6.074370e+00  
Na 8.099160e+00 -2.024790e+00 -6.074370e+00  
Na 1.012395e+01 -0.000000e+00 -6.074370e+00  
Na 0.000000e+00 -1.214874e+01 -4.049580e+00  
Na 2.024790e+00 -1.012395e+01 -4.049580e+00  
Na 4.049580e+00 -8.099160e+00 -4.049580e+00  
Na 6.074370e+00 -6.074370e+00 -4.049580e+00  
Na 8.099160e+00 -4.049580e+00 -4.049580e+00  
Na 1.012395e+01 -2.024790e+00 -4.049580e+00  
Na 1.214874e+01 -0.000000e+00 -4.049580e+00  
Na 2.024790e+00 -1.214874e+01 -2.024790e+00  
Na 4.049580e+00 -1.012395e+01 -2.024790e+00

Na 6.074370e+00 -8.099160e+00 -2.024790e+00  
Na 8.099160e+00 -6.074370e+00 -2.024790e+00  
Na 1.012395e+01 -4.049580e+00 -2.024790e+00  
Na 1.214874e+01 -2.024790e+00 -2.024790e+00  
Na 4.049580e+00 -1.214874e+01 -0.000000e+00  
Na 6.074370e+00 -1.012395e+01 -0.000000e+00  
Na 8.099160e+00 -8.099160e+00 -0.000000e+00  
Na 1.012395e+01 -6.074370e+00 -0.000000e+00  
Na 1.214874e+01 -4.049580e+00 -0.000000e+00  
Na -4.049580e+00 -4.049580e+00 -1.214874e+01  
Na -2.024790e+00 -2.024790e+00 -1.214874e+01  
Na 0.000000e+00 0.000000e+00 -1.214874e+01  
Na 2.024790e+00 2.024790e+00 -1.214874e+01  
Na 4.049580e+00 4.049580e+00 -1.214874e+01  
Na -4.049580e+00 -6.074370e+00 -1.012395e+01  
Na -2.024790e+00 -4.049580e+00 -1.012395e+01  
Na 0.000000e+00 -2.024790e+00 -1.012395e+01  
Na 2.024790e+00 0.000000e+00 -1.012395e+01  
Na 4.049580e+00 2.024790e+00 -1.012395e+01  
Na 6.074370e+00 4.049580e+00 -1.012395e+01  
Na -4.049580e+00 -8.099160e+00 -8.099160e+00  
Na -2.024790e+00 -6.074370e+00 -8.099160e+00  
Na 0.000000e+00 -4.049580e+00 -8.099160e+00  
Na 2.024790e+00 -2.024790e+00 -8.099160e+00  
Na 4.049580e+00 0.000000e+00 -8.099160e+00  
Na 6.074370e+00 2.024790e+00 -8.099160e+00  
Na 8.099160e+00 4.049580e+00 -8.099160e+00  
Na -4.049580e+00 -1.012395e+01 -6.074370e+00  
Na -2.024790e+00 -8.099160e+00 -6.074370e+00  
Na 0.000000e+00 -6.074370e+00 -6.074370e+00  
Na 2.024790e+00 -4.049580e+00 -6.074370e+00  
Na 4.049580e+00 -2.024790e+00 -6.074370e+00  
Na 6.074370e+00 0.000000e+00 -6.074370e+00

Na 8.099160e+00 2.024790e+00 -6.074370e+00  
Na 1.012395e+01 4.049580e+00 -6.074370e+00  
Na -4.049580e+00 -1.214874e+01 -4.049580e+00  
Na -2.024790e+00 -1.012395e+01 -4.049580e+00  
Na 0.000000e+00 -8.099160e+00 -4.049580e+00  
Na 2.024790e+00 -6.074370e+00 -4.049580e+00  
Na 4.049580e+00 -4.049580e+00 -4.049580e+00  
Na 6.074370e+00 -2.024790e+00 -4.049580e+00  
Na 8.099160e+00 0.000000e+00 -4.049580e+00  
Na 1.012395e+01 2.024790e+00 -4.049580e+00  
Na 1.214874e+01 4.049580e+00 -4.049580e+00  
Na -2.024790e+00 -1.214874e+01 -2.024790e+00  
Na 0.000000e+00 -1.012395e+01 -2.024790e+00  
Na 2.024790e+00 -8.099160e+00 -2.024790e+00  
Na 4.049580e+00 -6.074370e+00 -2.024790e+00  
Na 6.074370e+00 -4.049580e+00 -2.024790e+00  
Na 8.099160e+00 -2.024790e+00 -2.024790e+00  
Na 1.012395e+01 0.000000e+00 -2.024790e+00  
Na 1.214874e+01 2.024790e+00 -2.024790e+00  
Na 0.000000e+00 -1.214874e+01 0.000000e+00  
Na 2.024790e+00 -1.012395e+01 0.000000e+00  
Na 4.049580e+00 -8.099160e+00 0.000000e+00  
Na 6.074370e+00 -6.074370e+00 0.000000e+00  
Na 8.099160e+00 -4.049580e+00 0.000000e+00  
Na 1.012395e+01 -2.024790e+00 0.000000e+00  
Na 1.214874e+01 0.000000e+00 0.000000e+00  
Na 2.024790e+00 -1.214874e+01 2.024790e+00  
Na 4.049580e+00 -1.012395e+01 2.024790e+00  
Na 6.074370e+00 -8.099160e+00 2.024790e+00  
Na 8.099160e+00 -6.074370e+00 2.024790e+00  
Na 1.012395e+01 -4.049580e+00 2.024790e+00  
Na 1.214874e+01 -2.024790e+00 2.024790e+00  
Na 4.049580e+00 -1.214874e+01 4.049580e+00

Na 6.074370e+00 -1.012395e+01 4.049580e+00  
Na 8.099160e+00 -8.099160e+00 4.049580e+00  
Na 1.012395e+01 -6.074370e+00 4.049580e+00  
Na 1.214874e+01 -4.049580e+00 4.049580e+00  
Na -4.049580e+00 0.000000e+00 -1.214874e+01  
Na -2.024790e+00 2.024790e+00 -1.214874e+01  
Na -0.000000e+00 4.049580e+00 -1.214874e+01  
Na -6.074370e+00 -4.049580e+00 -1.012395e+01  
Na -4.049580e+00 -2.024790e+00 -1.012395e+01  
Na -2.024790e+00 0.000000e+00 -1.012395e+01  
Na 0.000000e+00 2.024790e+00 -1.012395e+01  
Na 2.024790e+00 4.049580e+00 -1.012395e+01  
Na 4.049580e+00 6.074370e+00 -1.012395e+01  
Na -6.074370e+00 -6.074370e+00 -8.099160e+00  
Na -4.049580e+00 -4.049580e+00 -8.099160e+00  
Na -2.024790e+00 -2.024790e+00 -8.099160e+00  
Na 0.000000e+00 0.000000e+00 -8.099160e+00  
Na 2.024790e+00 2.024790e+00 -8.099160e+00  
Na 4.049580e+00 4.049580e+00 -8.099160e+00  
Na 6.074370e+00 6.074370e+00 -8.099160e+00  
Na -6.074370e+00 -8.099160e+00 -6.074370e+00  
Na -4.049580e+00 -6.074370e+00 -6.074370e+00  
Na -2.024790e+00 -4.049580e+00 -6.074370e+00  
Na 0.000000e+00 -2.024790e+00 -6.074370e+00  
Na 2.024790e+00 0.000000e+00 -6.074370e+00  
Na 4.049580e+00 2.024790e+00 -6.074370e+00  
Na 6.074370e+00 4.049580e+00 -6.074370e+00  
Na 8.099160e+00 6.074370e+00 -6.074370e+00  
Na -6.074370e+00 -1.012395e+01 -4.049580e+00  
Na -4.049580e+00 -8.099160e+00 -4.049580e+00  
Na -2.024790e+00 -6.074370e+00 -4.049580e+00  
Na 0.000000e+00 -4.049580e+00 -4.049580e+00  
Na 2.024790e+00 -2.024790e+00 -4.049580e+00



Na 4.049580e+00 0.000000e+00 -4.049580e+00  
Na 6.074370e+00 2.024790e+00 -4.049580e+00  
Na 8.099160e+00 4.049580e+00 -4.049580e+00  
Na 1.012395e+01 6.074370e+00 -4.049580e+00  
Na -4.049580e+00 -1.012395e+01 -2.024790e+00  
Na -2.024790e+00 -8.099160e+00 -2.024790e+00  
Na 0.000000e+00 -6.074370e+00 -2.024790e+00  
Na 2.024790e+00 -4.049580e+00 -2.024790e+00  
Na 4.049580e+00 -2.024790e+00 -2.024790e+00  
Na 6.074370e+00 0.000000e+00 -2.024790e+00  
Na 8.099160e+00 2.024790e+00 -2.024790e+00  
Na 1.012395e+01 4.049580e+00 -2.024790e+00  
Na -4.049580e+00 -1.214874e+01 0.000000e+00  
Na -2.024790e+00 -1.012395e+01 0.000000e+00  
Na 0.000000e+00 -8.099160e+00 0.000000e+00  
Na 2.024790e+00 -6.074370e+00 0.000000e+00  
Na 4.049580e+00 -4.049580e+00 0.000000e+00  
Na 6.074370e+00 -2.024790e+00 0.000000e+00  
Na 8.099160e+00 0.000000e+00 0.000000e+00  
Na 1.012395e+01 2.024790e+00 0.000000e+00  
Na 1.214874e+01 4.049580e+00 0.000000e+00  
Na -2.024790e+00 -1.214874e+01 2.024790e+00  
Na 0.000000e+00 -1.012395e+01 2.024790e+00  
Na 2.024790e+00 -8.099160e+00 2.024790e+00  
Na 4.049580e+00 -6.074370e+00 2.024790e+00  
Na 6.074370e+00 -4.049580e+00 2.024790e+00  
Na 8.099160e+00 -2.024790e+00 2.024790e+00  
Na 1.012395e+01 0.000000e+00 2.024790e+00  
Na 1.214874e+01 2.024790e+00 2.024790e+00  
Na -0.000000e+00 -1.214874e+01 4.049580e+00  
Na 2.024790e+00 -1.012395e+01 4.049580e+00  
Na 4.049580e+00 -8.099160e+00 4.049580e+00  
Na 6.074370e+00 -6.074370e+00 4.049580e+00

Na 8.099160e+00 -4.049580e+00 4.049580e+00  
Na 1.012395e+01 -2.024790e+00 4.049580e+00  
Na 1.214874e+01 0.000000e+00 4.049580e+00  
Na 4.049580e+00 -1.012395e+01 6.074370e+00  
Na 6.074370e+00 -8.099160e+00 6.074370e+00  
Na 8.099160e+00 -6.074370e+00 6.074370e+00  
Na 1.012395e+01 -4.049580e+00 6.074370e+00  
Na -4.049580e+00 4.049580e+00 -1.214874e+01  
Na -6.074370e+00 0.000000e+00 -1.012395e+01  
Na -4.049580e+00 2.024790e+00 -1.012395e+01  
Na -2.024790e+00 4.049580e+00 -1.012395e+01  
Na -0.000000e+00 6.074370e+00 -1.012395e+01  
Na -8.099160e+00 -4.049580e+00 -8.099160e+00  
Na -6.074370e+00 -2.024790e+00 -8.099160e+00  
Na -4.049580e+00 0.000000e+00 -8.099160e+00  
Na -2.024790e+00 2.024790e+00 -8.099160e+00  
Na 0.000000e+00 4.049580e+00 -8.099160e+00  
Na 2.024790e+00 6.074370e+00 -8.099160e+00  
Na 4.049580e+00 8.099160e+00 -8.099160e+00  
Na -8.099160e+00 -6.074370e+00 -6.074370e+00  
Na -6.074370e+00 -4.049580e+00 -6.074370e+00  
Na -4.049580e+00 -2.024790e+00 -6.074370e+00  
Na -2.024790e+00 0.000000e+00 -6.074370e+00  
Na 0.000000e+00 2.024790e+00 -6.074370e+00  
Na 2.024790e+00 4.049580e+00 -6.074370e+00  
Na 4.049580e+00 6.074370e+00 -6.074370e+00  
Na 6.074370e+00 8.099160e+00 -6.074370e+00  
Na -8.099160e+00 -8.099160e+00 -4.049580e+00  
Na -6.074370e+00 -6.074370e+00 -4.049580e+00  
Na -4.049580e+00 -4.049580e+00 -4.049580e+00  
Na -2.024790e+00 -2.024790e+00 -4.049580e+00  
Na 0.000000e+00 0.000000e+00 -4.049580e+00  
Na 2.024790e+00 2.024790e+00 -4.049580e+00

Na 4.049580e+00 4.049580e+00 -4.049580e+00  
Na 6.074370e+00 6.074370e+00 -4.049580e+00  
Na 8.099160e+00 8.099160e+00 -4.049580e+00  
Na -6.074370e+00 -8.099160e+00 -2.024790e+00  
Na -4.049580e+00 -6.074370e+00 -2.024790e+00  
Na -2.024790e+00 -4.049580e+00 -2.024790e+00  
Na 0.000000e+00 -2.024790e+00 -2.024790e+00  
Na 2.024790e+00 0.000000e+00 -2.024790e+00  
Na 4.049580e+00 2.024790e+00 -2.024790e+00  
Na 6.074370e+00 4.049580e+00 -2.024790e+00  
Na 8.099160e+00 6.074370e+00 -2.024790e+00  
Na -6.074370e+00 -1.012395e+01 0.000000e+00  
Na -4.049580e+00 -8.099160e+00 0.000000e+00  
Na -2.024790e+00 -6.074370e+00 0.000000e+00  
Na 0.000000e+00 -4.049580e+00 0.000000e+00  
Na 2.024790e+00 -2.024790e+00 0.000000e+00  
Na 4.049580e+00 0.000000e+00 0.000000e+00  
Na 6.074370e+00 2.024790e+00 0.000000e+00  
Na 8.099160e+00 4.049580e+00 0.000000e+00  
Na 1.012395e+01 6.074370e+00 0.000000e+00  
Na -4.049580e+00 -1.012395e+01 2.024790e+00  
Na -2.024790e+00 -8.099160e+00 2.024790e+00  
Na 0.000000e+00 -6.074370e+00 2.024790e+00  
Na 2.024790e+00 -4.049580e+00 2.024790e+00  
Na 4.049580e+00 -2.024790e+00 2.024790e+00  
Na 6.074370e+00 0.000000e+00 2.024790e+00  
Na 8.099160e+00 2.024790e+00 2.024790e+00  
Na 1.012395e+01 4.049580e+00 2.024790e+00  
Na -4.049580e+00 -1.214874e+01 4.049580e+00  
Na -2.024790e+00 -1.012395e+01 4.049580e+00  
Na 0.000000e+00 -8.099160e+00 4.049580e+00  
Na 2.024790e+00 -6.074370e+00 4.049580e+00  
Na 4.049580e+00 -4.049580e+00 4.049580e+00

Na 6.074370e+00 -2.024790e+00 4.049580e+00  
Na 8.099160e+00 0.000000e+00 4.049580e+00  
Na 1.012395e+01 2.024790e+00 4.049580e+00  
Na 1.214874e+01 4.049580e+00 4.049580e+00  
Na -0.000000e+00 -1.012395e+01 6.074370e+00  
Na 2.024790e+00 -8.099160e+00 6.074370e+00  
Na 4.049580e+00 -6.074370e+00 6.074370e+00  
Na 6.074370e+00 -4.049580e+00 6.074370e+00  
Na 8.099160e+00 -2.024790e+00 6.074370e+00  
Na 1.012395e+01 0.000000e+00 6.074370e+00  
Na 4.049580e+00 -8.099160e+00 8.099160e+00  
Na 6.074370e+00 -6.074370e+00 8.099160e+00  
Na 8.099160e+00 -4.049580e+00 8.099160e+00  
Na -6.074370e+00 4.049580e+00 -1.012395e+01  
Na -4.049580e+00 6.074370e+00 -1.012395e+01  
Na -8.099160e+00 0.000000e+00 -8.099160e+00  
Na -6.074370e+00 2.024790e+00 -8.099160e+00  
Na -4.049580e+00 4.049580e+00 -8.099160e+00  
Na -2.024790e+00 6.074370e+00 -8.099160e+00  
Na -0.000000e+00 8.099160e+00 -8.099160e+00  
Na -1.012395e+01 -4.049580e+00 -6.074370e+00  
Na -8.099160e+00 -2.024790e+00 -6.074370e+00  
Na -6.074370e+00 0.000000e+00 -6.074370e+00  
Na -4.049580e+00 2.024790e+00 -6.074370e+00  
Na -2.024790e+00 4.049580e+00 -6.074370e+00  
Na 0.000000e+00 6.074370e+00 -6.074370e+00  
Na 2.024790e+00 8.099160e+00 -6.074370e+00  
Na 4.049580e+00 1.012395e+01 -6.074370e+00  
Na -1.012395e+01 -6.074370e+00 -4.049580e+00  
Na -8.099160e+00 -4.049580e+00 -4.049580e+00  
Na -6.074370e+00 -2.024790e+00 -4.049580e+00  
Na -4.049580e+00 0.000000e+00 -4.049580e+00  
Na -2.024790e+00 2.024790e+00 -4.049580e+00

Na 0.000000e+00 4.049580e+00 -4.049580e+00  
Na 2.024790e+00 6.074370e+00 -4.049580e+00  
Na 4.049580e+00 8.099160e+00 -4.049580e+00  
Na 6.074370e+00 1.012395e+01 -4.049580e+00  
Na -8.099160e+00 -6.074370e+00 -2.024790e+00  
Na -6.074370e+00 -4.049580e+00 -2.024790e+00  
Na -4.049580e+00 -2.024790e+00 -2.024790e+00  
Na -2.024790e+00 0.000000e+00 -2.024790e+00  
Na 0.000000e+00 2.024790e+00 -2.024790e+00  
Na 2.024790e+00 4.049580e+00 -2.024790e+00  
Na 4.049580e+00 6.074370e+00 -2.024790e+00  
Na 6.074370e+00 8.099160e+00 -2.024790e+00  
Na -8.099160e+00 -8.099160e+00 0.000000e+00  
Na -6.074370e+00 -6.074370e+00 0.000000e+00  
Na -4.049580e+00 -4.049580e+00 0.000000e+00  
Na -2.024790e+00 -2.024790e+00 0.000000e+00  
Na 0.000000e+00 0.000000e+00 0.000000e+00  
Na 2.024790e+00 2.024790e+00 0.000000e+00  
Na 4.049580e+00 4.049580e+00 0.000000e+00  
Na 6.074370e+00 6.074370e+00 0.000000e+00  
Na 8.099160e+00 8.099160e+00 0.000000e+00  
Na -6.074370e+00 -8.099160e+00 2.024790e+00  
Na -4.049580e+00 -6.074370e+00 2.024790e+00  
Na -2.024790e+00 -4.049580e+00 2.024790e+00  
Na 0.000000e+00 -2.024790e+00 2.024790e+00  
Na 2.024790e+00 0.000000e+00 2.024790e+00  
Na 4.049580e+00 2.024790e+00 2.024790e+00  
Na 6.074370e+00 4.049580e+00 2.024790e+00  
Na 8.099160e+00 6.074370e+00 2.024790e+00  
Na -6.074370e+00 -1.012395e+01 4.049580e+00  
Na -4.049580e+00 -8.099160e+00 4.049580e+00  
Na -2.024790e+00 -6.074370e+00 4.049580e+00  
Na 0.000000e+00 -4.049580e+00 4.049580e+00

Na 2.024790e+00 -2.024790e+00 4.049580e+00  
Na 4.049580e+00 0.000000e+00 4.049580e+00  
Na 6.074370e+00 2.024790e+00 4.049580e+00  
Na 8.099160e+00 4.049580e+00 4.049580e+00  
Na 1.012395e+01 6.074370e+00 4.049580e+00  
Na -4.049580e+00 -1.012395e+01 6.074370e+00  
Na -2.024790e+00 -8.099160e+00 6.074370e+00  
Na 0.000000e+00 -6.074370e+00 6.074370e+00  
Na 2.024790e+00 -4.049580e+00 6.074370e+00  
Na 4.049580e+00 -2.024790e+00 6.074370e+00  
Na 6.074370e+00 0.000000e+00 6.074370e+00  
Na 8.099160e+00 2.024790e+00 6.074370e+00  
Na 1.012395e+01 4.049580e+00 6.074370e+00  
Na -0.000000e+00 -8.099160e+00 8.099160e+00  
Na 2.024790e+00 -6.074370e+00 8.099160e+00  
Na 4.049580e+00 -4.049580e+00 8.099160e+00  
Na 6.074370e+00 -2.024790e+00 8.099160e+00  
Na 8.099160e+00 0.000000e+00 8.099160e+00  
Na 4.049580e+00 -6.074370e+00 1.012395e+01  
Na 6.074370e+00 -4.049580e+00 1.012395e+01  
Na -8.099160e+00 4.049580e+00 -8.099160e+00  
Na -6.074370e+00 6.074370e+00 -8.099160e+00  
Na -4.049580e+00 8.099160e+00 -8.099160e+00  
Na -1.012395e+01 0.000000e+00 -6.074370e+00  
Na -8.099160e+00 2.024790e+00 -6.074370e+00  
Na -6.074370e+00 4.049580e+00 -6.074370e+00  
Na -4.049580e+00 6.074370e+00 -6.074370e+00  
Na -2.024790e+00 8.099160e+00 -6.074370e+00  
Na -0.000000e+00 1.012395e+01 -6.074370e+00  
Na -1.214874e+01 -4.049580e+00 -4.049580e+00  
Na -1.012395e+01 -2.024790e+00 -4.049580e+00  
Na -8.099160e+00 0.000000e+00 -4.049580e+00  
Na -6.074370e+00 2.024790e+00 -4.049580e+00

Na -4.049580e+00 4.049580e+00 -4.049580e+00  
Na -2.024790e+00 6.074370e+00 -4.049580e+00  
Na 0.000000e+00 8.099160e+00 -4.049580e+00  
Na 2.024790e+00 1.012395e+01 -4.049580e+00  
Na 4.049580e+00 1.214874e+01 -4.049580e+00  
Na -1.012395e+01 -4.049580e+00 -2.024790e+00  
Na -8.099160e+00 -2.024790e+00 -2.024790e+00  
Na -6.074370e+00 0.000000e+00 -2.024790e+00  
Na -4.049580e+00 2.024790e+00 -2.024790e+00  
Na -2.024790e+00 4.049580e+00 -2.024790e+00  
Na 0.000000e+00 6.074370e+00 -2.024790e+00  
Na 2.024790e+00 8.099160e+00 -2.024790e+00  
Na 4.049580e+00 1.012395e+01 -2.024790e+00  
Na -1.012395e+01 -6.074370e+00 0.000000e+00  
Na -8.099160e+00 -4.049580e+00 0.000000e+00  
Na -6.074370e+00 -2.024790e+00 0.000000e+00  
Na -4.049580e+00 0.000000e+00 0.000000e+00  
Na -2.024790e+00 2.024790e+00 0.000000e+00  
Na 0.000000e+00 4.049580e+00 0.000000e+00  
Na 2.024790e+00 6.074370e+00 0.000000e+00  
Na 4.049580e+00 8.099160e+00 0.000000e+00  
Na 6.074370e+00 1.012395e+01 0.000000e+00  
Na -8.099160e+00 -6.074370e+00 2.024790e+00  
Na -6.074370e+00 -4.049580e+00 2.024790e+00  
Na -4.049580e+00 -2.024790e+00 2.024790e+00  
Na -2.024790e+00 0.000000e+00 2.024790e+00  
Na 0.000000e+00 2.024790e+00 2.024790e+00  
Na 2.024790e+00 4.049580e+00 2.024790e+00  
Na 4.049580e+00 6.074370e+00 2.024790e+00  
Na 6.074370e+00 8.099160e+00 2.024790e+00  
Na -8.099160e+00 -8.099160e+00 4.049580e+00  
Na -6.074370e+00 -6.074370e+00 4.049580e+00  
Na -4.049580e+00 -4.049580e+00 4.049580e+00

Na -2.024790e+00 -2.024790e+00 4.049580e+00  
Na 0.000000e+00 0.000000e+00 4.049580e+00  
Na 2.024790e+00 2.024790e+00 4.049580e+00  
Na 4.049580e+00 4.049580e+00 4.049580e+00  
Na 6.074370e+00 6.074370e+00 4.049580e+00  
Na 8.099160e+00 8.099160e+00 4.049580e+00  
Na -6.074370e+00 -8.099160e+00 6.074370e+00  
Na -4.049580e+00 -6.074370e+00 6.074370e+00  
Na -2.024790e+00 -4.049580e+00 6.074370e+00  
Na 0.000000e+00 -2.024790e+00 6.074370e+00  
Na 2.024790e+00 0.000000e+00 6.074370e+00  
Na 4.049580e+00 2.024790e+00 6.074370e+00  
Na 6.074370e+00 4.049580e+00 6.074370e+00  
Na 8.099160e+00 6.074370e+00 6.074370e+00  
Na -4.049580e+00 -8.099160e+00 8.099160e+00  
Na -2.024790e+00 -6.074370e+00 8.099160e+00  
Na 0.000000e+00 -4.049580e+00 8.099160e+00  
Na 2.024790e+00 -2.024790e+00 8.099160e+00  
Na 4.049580e+00 0.000000e+00 8.099160e+00  
Na 6.074370e+00 2.024790e+00 8.099160e+00  
Na 8.099160e+00 4.049580e+00 8.099160e+00  
Na -0.000000e+00 -6.074370e+00 1.012395e+01  
Na 2.024790e+00 -4.049580e+00 1.012395e+01  
Na 4.049580e+00 -2.024790e+00 1.012395e+01  
Na 6.074370e+00 0.000000e+00 1.012395e+01  
Na 4.049580e+00 -4.049580e+00 1.214874e+01  
Na -1.012395e+01 4.049580e+00 -6.074370e+00  
Na -8.099160e+00 6.074370e+00 -6.074370e+00  
Na -6.074370e+00 8.099160e+00 -6.074370e+00  
Na -4.049580e+00 1.012395e+01 -6.074370e+00  
Na -1.214874e+01 0.000000e+00 -4.049580e+00  
Na -1.012395e+01 2.024790e+00 -4.049580e+00  
Na -8.099160e+00 4.049580e+00 -4.049580e+00



Na -6.074370e+00 6.074370e+00 -4.049580e+00  
Na -4.049580e+00 8.099160e+00 -4.049580e+00  
Na -2.024790e+00 1.012395e+01 -4.049580e+00  
Na -0.000000e+00 1.214874e+01 -4.049580e+00  
Na -1.214874e+01 -2.024790e+00 -2.024790e+00  
Na -1.012395e+01 0.000000e+00 -2.024790e+00  
Na -8.099160e+00 2.024790e+00 -2.024790e+00  
Na -6.074370e+00 4.049580e+00 -2.024790e+00  
Na -4.049580e+00 6.074370e+00 -2.024790e+00  
Na -2.024790e+00 8.099160e+00 -2.024790e+00  
Na 0.000000e+00 1.012395e+01 -2.024790e+00  
Na 2.024790e+00 1.214874e+01 -2.024790e+00  
Na -1.214874e+01 -4.049580e+00 0.000000e+00  
Na -1.012395e+01 -2.024790e+00 0.000000e+00  
Na -8.099160e+00 0.000000e+00 0.000000e+00  
Na -6.074370e+00 2.024790e+00 0.000000e+00  
Na -4.049580e+00 4.049580e+00 0.000000e+00  
Na -2.024790e+00 6.074370e+00 0.000000e+00  
Na 0.000000e+00 8.099160e+00 0.000000e+00  
Na 2.024790e+00 1.012395e+01 0.000000e+00  
Na 4.049580e+00 1.214874e+01 0.000000e+00  
Na -1.012395e+01 -4.049580e+00 2.024790e+00  
Na -8.099160e+00 -2.024790e+00 2.024790e+00  
Na -6.074370e+00 0.000000e+00 2.024790e+00  
Na -4.049580e+00 2.024790e+00 2.024790e+00  
Na -2.024790e+00 4.049580e+00 2.024790e+00  
Na 0.000000e+00 6.074370e+00 2.024790e+00  
Na 2.024790e+00 8.099160e+00 2.024790e+00  
Na 4.049580e+00 1.012395e+01 2.024790e+00  
Na -1.012395e+01 -6.074370e+00 4.049580e+00  
Na -8.099160e+00 -4.049580e+00 4.049580e+00  
Na -6.074370e+00 -2.024790e+00 4.049580e+00  
Na -4.049580e+00 0.000000e+00 4.049580e+00

Na -2.024790e+00 2.024790e+00 4.049580e+00  
Na 0.000000e+00 4.049580e+00 4.049580e+00  
Na 2.024790e+00 6.074370e+00 4.049580e+00  
Na 4.049580e+00 8.099160e+00 4.049580e+00  
Na 6.074370e+00 1.012395e+01 4.049580e+00  
Na -8.099160e+00 -6.074370e+00 6.074370e+00  
Na -6.074370e+00 -4.049580e+00 6.074370e+00  
Na -4.049580e+00 -2.024790e+00 6.074370e+00  
Na -2.024790e+00 0.000000e+00 6.074370e+00  
Na 0.000000e+00 2.024790e+00 6.074370e+00  
Na 2.024790e+00 4.049580e+00 6.074370e+00  
Na 4.049580e+00 6.074370e+00 6.074370e+00  
Na 6.074370e+00 8.099160e+00 6.074370e+00  
Na -6.074370e+00 -6.074370e+00 8.099160e+00  
Na -4.049580e+00 -4.049580e+00 8.099160e+00  
Na -2.024790e+00 -2.024790e+00 8.099160e+00  
Na 0.000000e+00 0.000000e+00 8.099160e+00  
Na 2.024790e+00 2.024790e+00 8.099160e+00  
Na 4.049580e+00 4.049580e+00 8.099160e+00  
Na 6.074370e+00 6.074370e+00 8.099160e+00  
Na -4.049580e+00 -6.074370e+00 1.012395e+01  
Na -2.024790e+00 -4.049580e+00 1.012395e+01  
Na 0.000000e+00 -2.024790e+00 1.012395e+01  
Na 2.024790e+00 0.000000e+00 1.012395e+01  
Na 4.049580e+00 2.024790e+00 1.012395e+01  
Na 6.074370e+00 4.049580e+00 1.012395e+01  
Na -0.000000e+00 -4.049580e+00 1.214874e+01  
Na 2.024790e+00 -2.024790e+00 1.214874e+01  
Na 4.049580e+00 0.000000e+00 1.214874e+01  
Na -1.214874e+01 4.049580e+00 -4.049580e+00  
Na -1.012395e+01 6.074370e+00 -4.049580e+00  
Na -8.099160e+00 8.099160e+00 -4.049580e+00  
Na -6.074370e+00 1.012395e+01 -4.049580e+00

Na -4.049580e+00 1.214874e+01 -4.049580e+00  
Na -1.214874e+01 2.024790e+00 -2.024790e+00  
Na -1.012395e+01 4.049580e+00 -2.024790e+00  
Na -8.099160e+00 6.074370e+00 -2.024790e+00  
Na -6.074370e+00 8.099160e+00 -2.024790e+00  
Na -4.049580e+00 1.012395e+01 -2.024790e+00  
Na -2.024790e+00 1.214874e+01 -2.024790e+00  
Na -1.214874e+01 0.000000e+00 0.000000e+00  
Na -1.012395e+01 2.024790e+00 0.000000e+00  
Na -8.099160e+00 4.049580e+00 0.000000e+00  
Na -6.074370e+00 6.074370e+00 0.000000e+00  
Na -4.049580e+00 8.099160e+00 0.000000e+00  
Na -2.024790e+00 1.012395e+01 0.000000e+00  
Na 0.000000e+00 1.214874e+01 0.000000e+00  
Na -1.214874e+01 -2.024790e+00 2.024790e+00  
Na -1.012395e+01 0.000000e+00 2.024790e+00  
Na -8.099160e+00 2.024790e+00 2.024790e+00  
Na -6.074370e+00 4.049580e+00 2.024790e+00  
Na -4.049580e+00 6.074370e+00 2.024790e+00  
Na -2.024790e+00 8.099160e+00 2.024790e+00  
Na 0.000000e+00 1.012395e+01 2.024790e+00  
Na 2.024790e+00 1.214874e+01 2.024790e+00  
Na -1.214874e+01 -4.049580e+00 4.049580e+00  
Na -1.012395e+01 -2.024790e+00 4.049580e+00  
Na -8.099160e+00 0.000000e+00 4.049580e+00  
Na -6.074370e+00 2.024790e+00 4.049580e+00  
Na -4.049580e+00 4.049580e+00 4.049580e+00  
Na -2.024790e+00 6.074370e+00 4.049580e+00  
Na 0.000000e+00 8.099160e+00 4.049580e+00  
Na 2.024790e+00 1.012395e+01 4.049580e+00  
Na 4.049580e+00 1.214874e+01 4.049580e+00  
Na -1.012395e+01 -4.049580e+00 6.074370e+00  
Na -8.099160e+00 -2.024790e+00 6.074370e+00

Na -6.074370e+00 0.000000e+00 6.074370e+00  
Na -4.049580e+00 2.024790e+00 6.074370e+00  
Na -2.024790e+00 4.049580e+00 6.074370e+00  
Na 0.000000e+00 6.074370e+00 6.074370e+00  
Na 2.024790e+00 8.099160e+00 6.074370e+00  
Na 4.049580e+00 1.012395e+01 6.074370e+00  
Na -8.099160e+00 -4.049580e+00 8.099160e+00  
Na -6.074370e+00 -2.024790e+00 8.099160e+00  
Na -4.049580e+00 0.000000e+00 8.099160e+00  
Na -2.024790e+00 2.024790e+00 8.099160e+00  
Na 0.000000e+00 4.049580e+00 8.099160e+00  
Na 2.024790e+00 6.074370e+00 8.099160e+00  
Na 4.049580e+00 8.099160e+00 8.099160e+00  
Na -6.074370e+00 -4.049580e+00 1.012395e+01  
Na -4.049580e+00 -2.024790e+00 1.012395e+01  
Na -2.024790e+00 0.000000e+00 1.012395e+01  
Na 0.000000e+00 2.024790e+00 1.012395e+01  
Na 2.024790e+00 4.049580e+00 1.012395e+01  
Na 4.049580e+00 6.074370e+00 1.012395e+01  
Na -4.049580e+00 -4.049580e+00 1.214874e+01  
Na -2.024790e+00 -2.024790e+00 1.214874e+01  
Na 0.000000e+00 0.000000e+00 1.214874e+01  
Na 2.024790e+00 2.024790e+00 1.214874e+01  
Na 4.049580e+00 4.049580e+00 1.214874e+01  
Na -1.214874e+01 4.049580e+00 -0.000000e+00  
Na -1.012395e+01 6.074370e+00 -0.000000e+00  
Na -8.099160e+00 8.099160e+00 -0.000000e+00  
Na -6.074370e+00 1.012395e+01 -0.000000e+00  
Na -4.049580e+00 1.214874e+01 -0.000000e+00  
Na -1.214874e+01 2.024790e+00 2.024790e+00  
Na -1.012395e+01 4.049580e+00 2.024790e+00  
Na -8.099160e+00 6.074370e+00 2.024790e+00  
Na -6.074370e+00 8.099160e+00 2.024790e+00

Na -4.049580e+00 1.012395e+01 2.024790e+00  
Na -2.024790e+00 1.214874e+01 2.024790e+00  
Na -1.214874e+01 -0.000000e+00 4.049580e+00  
Na -1.012395e+01 2.024790e+00 4.049580e+00  
Na -8.099160e+00 4.049580e+00 4.049580e+00  
Na -6.074370e+00 6.074370e+00 4.049580e+00  
Na -4.049580e+00 8.099160e+00 4.049580e+00  
Na -2.024790e+00 1.012395e+01 4.049580e+00  
Na 0.000000e+00 1.214874e+01 4.049580e+00  
Na -1.012395e+01 -0.000000e+00 6.074370e+00  
Na -8.099160e+00 2.024790e+00 6.074370e+00  
Na -6.074370e+00 4.049580e+00 6.074370e+00  
Na -4.049580e+00 6.074370e+00 6.074370e+00  
Na -2.024790e+00 8.099160e+00 6.074370e+00  
Na 0.000000e+00 1.012395e+01 6.074370e+00  
Na -8.099160e+00 -0.000000e+00 8.099160e+00  
Na -6.074370e+00 2.024790e+00 8.099160e+00  
Na -4.049580e+00 4.049580e+00 8.099160e+00  
Na -2.024790e+00 6.074370e+00 8.099160e+00  
Na 0.000000e+00 8.099160e+00 8.099160e+00  
Na -6.074370e+00 -0.000000e+00 1.012395e+01  
Na -4.049580e+00 2.024790e+00 1.012395e+01  
Na -2.024790e+00 4.049580e+00 1.012395e+01  
Na 0.000000e+00 6.074370e+00 1.012395e+01  
Na -4.049580e+00 -0.000000e+00 1.214874e+01  
Na -2.024790e+00 2.024790e+00 1.214874e+01  
Na 0.000000e+00 4.049580e+00 1.214874e+01  
Na -1.214874e+01 4.049580e+00 4.049580e+00  
Na -1.012395e+01 6.074370e+00 4.049580e+00  
Na -8.099160e+00 8.099160e+00 4.049580e+00  
Na -6.074370e+00 1.012395e+01 4.049580e+00  
Na -4.049580e+00 1.214874e+01 4.049580e+00  
Na -1.012395e+01 4.049580e+00 6.074370e+00

Na -8.099160e+00 6.074370e+00 6.074370e+00  
Na -6.074370e+00 8.099160e+00 6.074370e+00  
Na -4.049580e+00 1.012395e+01 6.074370e+00  
Na -8.099160e+00 4.049580e+00 8.099160e+00  
Na -6.074370e+00 6.074370e+00 8.099160e+00  
Na -4.049580e+00 8.099160e+00 8.099160e+00  
Na -6.074370e+00 4.049580e+00 1.012395e+01  
Na -4.049580e+00 6.074370e+00 1.012395e+01  
Na -4.049580e+00 4.049580e+00 1.214874e+01

### **Atomic coordinates of Na 1.00 nm nanoparticle**

Na 4.049580e+00 -4.049580e+00 -8.099160e+00  
Na 4.049580e+00 -6.074370e+00 -6.074370e+00  
Na 6.074370e+00 -4.049580e+00 -6.074370e+00  
Na 4.049580e+00 -8.099160e+00 -4.049580e+00  
Na 6.074370e+00 -6.074370e+00 -4.049580e+00  
Na 8.099160e+00 -4.049580e+00 -4.049580e+00  
Na 0.000000e+00 -4.049580e+00 -8.099160e+00  
Na 2.024790e+00 -2.024790e+00 -8.099160e+00  
Na 4.049580e+00 0.000000e+00 -8.099160e+00  
Na 0.000000e+00 -6.074370e+00 -6.074370e+00  
Na 2.024790e+00 -4.049580e+00 -6.074370e+00  
Na 4.049580e+00 -2.024790e+00 -6.074370e+00  
Na 6.074370e+00 0.000000e+00 -6.074370e+00  
Na 0.000000e+00 -8.099160e+00 -4.049580e+00  
Na 2.024790e+00 -6.074370e+00 -4.049580e+00  
Na 4.049580e+00 -4.049580e+00 -4.049580e+00  
Na 6.074370e+00 -2.024790e+00 -4.049580e+00  
Na 8.099160e+00 0.000000e+00 -4.049580e+00  
Na 2.024790e+00 -8.099160e+00 -2.024790e+00  
Na 4.049580e+00 -6.074370e+00 -2.024790e+00

Na 6.074370e+00 -4.049580e+00 -2.024790e+00  
Na 8.099160e+00 -2.024790e+00 -2.024790e+00  
Na 4.049580e+00 -8.099160e+00 0.000000e+00  
Na 6.074370e+00 -6.074370e+00 0.000000e+00  
Na 8.099160e+00 -4.049580e+00 0.000000e+00  
Na -4.049580e+00 -4.049580e+00 -8.099160e+00  
Na -2.024790e+00 -2.024790e+00 -8.099160e+00  
Na 0.000000e+00 0.000000e+00 -8.099160e+00  
Na 2.024790e+00 2.024790e+00 -8.099160e+00  
Na 4.049580e+00 4.049580e+00 -8.099160e+00  
Na -4.049580e+00 -6.074370e+00 -6.074370e+00  
Na -2.024790e+00 -4.049580e+00 -6.074370e+00  
Na 0.000000e+00 -2.024790e+00 -6.074370e+00  
Na 2.024790e+00 0.000000e+00 -6.074370e+00  
Na 4.049580e+00 2.024790e+00 -6.074370e+00  
Na 6.074370e+00 4.049580e+00 -6.074370e+00  
Na -4.049580e+00 -8.099160e+00 -4.049580e+00  
Na -2.024790e+00 -6.074370e+00 -4.049580e+00  
Na 0.000000e+00 -4.049580e+00 -4.049580e+00  
Na 2.024790e+00 -2.024790e+00 -4.049580e+00  
Na 4.049580e+00 0.000000e+00 -4.049580e+00  
Na 6.074370e+00 2.024790e+00 -4.049580e+00  
Na 8.099160e+00 4.049580e+00 -4.049580e+00  
Na -2.024790e+00 -8.099160e+00 -2.024790e+00  
Na 0.000000e+00 -6.074370e+00 -2.024790e+00  
Na 2.024790e+00 -4.049580e+00 -2.024790e+00  
Na 4.049580e+00 -2.024790e+00 -2.024790e+00  
Na 6.074370e+00 0.000000e+00 -2.024790e+00  
Na 8.099160e+00 2.024790e+00 -2.024790e+00  
Na 0.000000e+00 -8.099160e+00 0.000000e+00  
Na 2.024790e+00 -6.074370e+00 0.000000e+00  
Na 4.049580e+00 -4.049580e+00 0.000000e+00  
Na 6.074370e+00 -2.024790e+00 0.000000e+00

Na 8.099160e+00 0.000000e+00 0.000000e+00  
Na 2.024790e+00 -8.099160e+00 2.024790e+00  
Na 4.049580e+00 -6.074370e+00 2.024790e+00  
Na 6.074370e+00 -4.049580e+00 2.024790e+00  
Na 8.099160e+00 -2.024790e+00 2.024790e+00  
Na 4.049580e+00 -8.099160e+00 4.049580e+00  
Na 6.074370e+00 -6.074370e+00 4.049580e+00  
Na 8.099160e+00 -4.049580e+00 4.049580e+00  
Na -4.049580e+00 0.000000e+00 -8.099160e+00  
Na -2.024790e+00 2.024790e+00 -8.099160e+00  
Na 0.000000e+00 4.049580e+00 -8.099160e+00  
Na -6.074370e+00 -4.049580e+00 -6.074370e+00  
Na -4.049580e+00 -2.024790e+00 -6.074370e+00  
Na -2.024790e+00 0.000000e+00 -6.074370e+00  
Na 0.000000e+00 2.024790e+00 -6.074370e+00  
Na 2.024790e+00 4.049580e+00 -6.074370e+00  
Na 4.049580e+00 6.074370e+00 -6.074370e+00  
Na -6.074370e+00 -6.074370e+00 -4.049580e+00  
Na -4.049580e+00 -4.049580e+00 -4.049580e+00  
Na -2.024790e+00 -2.024790e+00 -4.049580e+00  
Na 0.000000e+00 0.000000e+00 -4.049580e+00  
Na 2.024790e+00 2.024790e+00 -4.049580e+00  
Na 4.049580e+00 4.049580e+00 -4.049580e+00  
Na 6.074370e+00 6.074370e+00 -4.049580e+00  
Na -4.049580e+00 -6.074370e+00 -2.024790e+00  
Na -2.024790e+00 -4.049580e+00 -2.024790e+00  
Na 0.000000e+00 -2.024790e+00 -2.024790e+00  
Na 2.024790e+00 0.000000e+00 -2.024790e+00  
Na 4.049580e+00 2.024790e+00 -2.024790e+00  
Na 6.074370e+00 4.049580e+00 -2.024790e+00  
Na -4.049580e+00 -8.099160e+00 0.000000e+00  
Na -2.024790e+00 -6.074370e+00 0.000000e+00  
Na 0.000000e+00 -4.049580e+00 0.000000e+00



Na 2.024790e+00 -2.024790e+00 0.000000e+00  
Na 4.049580e+00 0.000000e+00 0.000000e+00  
Na 6.074370e+00 2.024790e+00 0.000000e+00  
Na 8.099160e+00 4.049580e+00 0.000000e+00  
Na -2.024790e+00 -8.099160e+00 2.024790e+00  
Na 0.000000e+00 -6.074370e+00 2.024790e+00  
Na 2.024790e+00 -4.049580e+00 2.024790e+00  
Na 4.049580e+00 -2.024790e+00 2.024790e+00  
Na 6.074370e+00 0.000000e+00 2.024790e+00  
Na 8.099160e+00 2.024790e+00 2.024790e+00  
Na 0.000000e+00 -8.099160e+00 4.049580e+00  
Na 2.024790e+00 -6.074370e+00 4.049580e+00  
Na 4.049580e+00 -4.049580e+00 4.049580e+00  
Na 6.074370e+00 -2.024790e+00 4.049580e+00  
Na 8.099160e+00 0.000000e+00 4.049580e+00  
Na 4.049580e+00 -6.074370e+00 6.074370e+00  
Na 6.074370e+00 -4.049580e+00 6.074370e+00  
Na -4.049580e+00 4.049580e+00 -8.099160e+00  
Na -6.074370e+00 0.000000e+00 -6.074370e+00  
Na -4.049580e+00 2.024790e+00 -6.074370e+00  
Na -2.024790e+00 4.049580e+00 -6.074370e+00  
Na 0.000000e+00 6.074370e+00 -6.074370e+00  
Na -8.099160e+00 -4.049580e+00 -4.049580e+00  
Na -6.074370e+00 -2.024790e+00 -4.049580e+00  
Na -4.049580e+00 0.000000e+00 -4.049580e+00  
Na -2.024790e+00 2.024790e+00 -4.049580e+00  
Na 0.000000e+00 4.049580e+00 -4.049580e+00  
Na 2.024790e+00 6.074370e+00 -4.049580e+00  
Na 4.049580e+00 8.099160e+00 -4.049580e+00  
Na -6.074370e+00 -4.049580e+00 -2.024790e+00  
Na -4.049580e+00 -2.024790e+00 -2.024790e+00  
Na -2.024790e+00 0.000000e+00 -2.024790e+00  
Na 0.000000e+00 2.024790e+00 -2.024790e+00

Na 2.024790e+00 4.049580e+00 -2.024790e+00  
Na 4.049580e+00 6.074370e+00 -2.024790e+00  
Na -6.074370e+00 -6.074370e+00 0.000000e+00  
Na -4.049580e+00 -4.049580e+00 0.000000e+00  
Na -2.024790e+00 -2.024790e+00 0.000000e+00  
Na 0.000000e+00 0.000000e+00 0.000000e+00  
Na 2.024790e+00 2.024790e+00 0.000000e+00  
Na 4.049580e+00 4.049580e+00 0.000000e+00  
Na 6.074370e+00 6.074370e+00 0.000000e+00  
Na -4.049580e+00 -6.074370e+00 2.024790e+00  
Na -2.024790e+00 -4.049580e+00 2.024790e+00  
Na 0.000000e+00 -2.024790e+00 2.024790e+00  
Na 2.024790e+00 0.000000e+00 2.024790e+00  
Na 4.049580e+00 2.024790e+00 2.024790e+00  
Na 6.074370e+00 4.049580e+00 2.024790e+00  
Na -4.049580e+00 -8.099160e+00 4.049580e+00  
Na -2.024790e+00 -6.074370e+00 4.049580e+00  
Na 0.000000e+00 -4.049580e+00 4.049580e+00  
Na 2.024790e+00 -2.024790e+00 4.049580e+00  
Na 4.049580e+00 0.000000e+00 4.049580e+00  
Na 6.074370e+00 2.024790e+00 4.049580e+00  
Na 8.099160e+00 4.049580e+00 4.049580e+00  
Na 0.000000e+00 -6.074370e+00 6.074370e+00  
Na 2.024790e+00 -4.049580e+00 6.074370e+00  
Na 4.049580e+00 -2.024790e+00 6.074370e+00  
Na 6.074370e+00 0.000000e+00 6.074370e+00  
Na 4.049580e+00 -4.049580e+00 8.099160e+00  
Na -6.074370e+00 4.049580e+00 -6.074370e+00  
Na -4.049580e+00 6.074370e+00 -6.074370e+00  
Na -8.099160e+00 0.000000e+00 -4.049580e+00  
Na -6.074370e+00 2.024790e+00 -4.049580e+00  
Na -4.049580e+00 4.049580e+00 -4.049580e+00  
Na -2.024790e+00 6.074370e+00 -4.049580e+00

Na 0.000000e+00 8.099160e+00 -4.049580e+00  
Na -8.099160e+00 -2.024790e+00 -2.024790e+00  
Na -6.074370e+00 0.000000e+00 -2.024790e+00  
Na -4.049580e+00 2.024790e+00 -2.024790e+00  
Na -2.024790e+00 4.049580e+00 -2.024790e+00  
Na 0.000000e+00 6.074370e+00 -2.024790e+00  
Na 2.024790e+00 8.099160e+00 -2.024790e+00  
Na -8.099160e+00 -4.049580e+00 0.000000e+00  
Na -6.074370e+00 -2.024790e+00 0.000000e+00  
Na -4.049580e+00 0.000000e+00 0.000000e+00  
Na -2.024790e+00 2.024790e+00 0.000000e+00  
Na 0.000000e+00 4.049580e+00 0.000000e+00  
Na 2.024790e+00 6.074370e+00 0.000000e+00  
Na 4.049580e+00 8.099160e+00 0.000000e+00  
Na -6.074370e+00 -4.049580e+00 2.024790e+00  
Na -4.049580e+00 -2.024790e+00 2.024790e+00  
Na -2.024790e+00 0.000000e+00 2.024790e+00  
Na 0.000000e+00 2.024790e+00 2.024790e+00  
Na 2.024790e+00 4.049580e+00 2.024790e+00  
Na 4.049580e+00 6.074370e+00 2.024790e+00  
Na -6.074370e+00 -6.074370e+00 4.049580e+00  
Na -4.049580e+00 -4.049580e+00 4.049580e+00  
Na -2.024790e+00 -2.024790e+00 4.049580e+00  
Na 0.000000e+00 0.000000e+00 4.049580e+00  
Na 2.024790e+00 2.024790e+00 4.049580e+00  
Na 4.049580e+00 4.049580e+00 4.049580e+00  
Na 6.074370e+00 6.074370e+00 4.049580e+00  
Na -4.049580e+00 -6.074370e+00 6.074370e+00  
Na -2.024790e+00 -4.049580e+00 6.074370e+00  
Na 0.000000e+00 -2.024790e+00 6.074370e+00  
Na 2.024790e+00 0.000000e+00 6.074370e+00  
Na 4.049580e+00 2.024790e+00 6.074370e+00  
Na 6.074370e+00 4.049580e+00 6.074370e+00

Na 0.000000e+00 -4.049580e+00 8.099160e+00  
Na 2.024790e+00 -2.024790e+00 8.099160e+00  
Na 4.049580e+00 0.000000e+00 8.099160e+00  
Na -8.099160e+00 4.049580e+00 -4.049580e+00  
Na -6.074370e+00 6.074370e+00 -4.049580e+00  
Na -4.049580e+00 8.099160e+00 -4.049580e+00  
Na -8.099160e+00 2.024790e+00 -2.024790e+00  
Na -6.074370e+00 4.049580e+00 -2.024790e+00  
Na -4.049580e+00 6.074370e+00 -2.024790e+00  
Na -2.024790e+00 8.099160e+00 -2.024790e+00  
Na -8.099160e+00 0.000000e+00 0.000000e+00  
Na -6.074370e+00 2.024790e+00 0.000000e+00  
Na -4.049580e+00 4.049580e+00 0.000000e+00  
Na -2.024790e+00 6.074370e+00 0.000000e+00  
Na 0.000000e+00 8.099160e+00 0.000000e+00  
Na -8.099160e+00 -2.024790e+00 2.024790e+00  
Na -6.074370e+00 0.000000e+00 2.024790e+00  
Na -4.049580e+00 2.024790e+00 2.024790e+00  
Na -2.024790e+00 4.049580e+00 2.024790e+00  
Na 0.000000e+00 6.074370e+00 2.024790e+00  
Na 2.024790e+00 8.099160e+00 2.024790e+00  
Na -8.099160e+00 -4.049580e+00 4.049580e+00  
Na -6.074370e+00 -2.024790e+00 4.049580e+00  
Na -4.049580e+00 0.000000e+00 4.049580e+00  
Na -2.024790e+00 2.024790e+00 4.049580e+00  
Na 0.000000e+00 4.049580e+00 4.049580e+00  
Na 2.024790e+00 6.074370e+00 4.049580e+00  
Na 4.049580e+00 8.099160e+00 4.049580e+00  
Na -6.074370e+00 -4.049580e+00 6.074370e+00  
Na -4.049580e+00 -2.024790e+00 6.074370e+00  
Na -2.024790e+00 0.000000e+00 6.074370e+00  
Na 0.000000e+00 2.024790e+00 6.074370e+00  
Na 2.024790e+00 4.049580e+00 6.074370e+00

Na 4.049580e+00 6.074370e+00 6.074370e+00  
Na -4.049580e+00 -4.049580e+00 8.099160e+00  
Na -2.024790e+00 -2.024790e+00 8.099160e+00  
Na 0.000000e+00 0.000000e+00 8.099160e+00  
Na 2.024790e+00 2.024790e+00 8.099160e+00  
Na 4.049580e+00 4.049580e+00 8.099160e+00  
Na -8.099160e+00 4.049580e+00 0.000000e+00  
Na -6.074370e+00 6.074370e+00 0.000000e+00  
Na -4.049580e+00 8.099160e+00 0.000000e+00  
Na -8.099160e+00 2.024790e+00 2.024790e+00  
Na -6.074370e+00 4.049580e+00 2.024790e+00  
Na -4.049580e+00 6.074370e+00 2.024790e+00  
Na -2.024790e+00 8.099160e+00 2.024790e+00  
Na -8.099160e+00 0.000000e+00 4.049580e+00  
Na -6.074370e+00 2.024790e+00 4.049580e+00  
Na -4.049580e+00 4.049580e+00 4.049580e+00  
Na -2.024790e+00 6.074370e+00 4.049580e+00  
Na 0.000000e+00 8.099160e+00 4.049580e+00  
Na -6.074370e+00 0.000000e+00 6.074370e+00  
Na -4.049580e+00 2.024790e+00 6.074370e+00  
Na -2.024790e+00 4.049580e+00 6.074370e+00  
Na 0.000000e+00 6.074370e+00 6.074370e+00  
Na -4.049580e+00 0.000000e+00 8.099160e+00  
Na -2.024790e+00 2.024790e+00 8.099160e+00  
Na 0.000000e+00 4.049580e+00 8.099160e+00  
Na -8.099160e+00 4.049580e+00 4.049580e+00  
Na -6.074370e+00 6.074370e+00 4.049580e+00  
Na -4.049580e+00 8.099160e+00 4.049580e+00  
Na -6.074370e+00 4.049580e+00 6.074370e+00  
Na -4.049580e+00 6.074370e+00 6.074370e+00  
Na -4.049580e+00 4.049580e+00 8.099160e+00

### Atomic coordinates of Na 0.75 nm nanoparticle

Na 2.024790e+00 -4.049580e+00 -6.074370e+00  
Na 4.049580e+00 -2.024790e+00 -6.074370e+00  
Na 2.024790e+00 -6.074370e+00 -4.049580e+00  
Na 4.049580e+00 -4.049580e+00 -4.049580e+00  
Na 6.074370e+00 -2.024790e+00 -4.049580e+00  
Na 4.049580e+00 -6.074370e+00 -2.024790e+00  
Na 6.074370e+00 -4.049580e+00 -2.024790e+00  
Na -2.024790e+00 -4.049580e+00 -6.074370e+00  
Na 0.000000e+00 -2.024790e+00 -6.074370e+00  
Na 2.024790e+00 0.000000e+00 -6.074370e+00  
Na 4.049580e+00 2.024790e+00 -6.074370e+00  
Na -2.024790e+00 -6.074370e+00 -4.049580e+00  
Na 0.000000e+00 -4.049580e+00 -4.049580e+00  
Na 2.024790e+00 -2.024790e+00 -4.049580e+00  
Na 4.049580e+00 0.000000e+00 -4.049580e+00  
Na 6.074370e+00 2.024790e+00 -4.049580e+00  
Na 0.000000e+00 -6.074370e+00 -2.024790e+00  
Na 2.024790e+00 -4.049580e+00 -2.024790e+00  
Na 4.049580e+00 -2.024790e+00 -2.024790e+00  
Na 6.074370e+00 0.000000e+00 -2.024790e+00  
Na 2.024790e+00 -6.074370e+00 0.000000e+00  
Na 4.049580e+00 -4.049580e+00 0.000000e+00  
Na 6.074370e+00 -2.024790e+00 0.000000e+00  
Na 4.049580e+00 -6.074370e+00 2.024790e+00  
Na 6.074370e+00 -4.049580e+00 2.024790e+00  
Na -4.049580e+00 -2.024790e+00 -6.074370e+00  
Na -2.024790e+00 0.000000e+00 -6.074370e+00  
Na 0.000000e+00 2.024790e+00 -6.074370e+00  
Na 2.024790e+00 4.049580e+00 -6.074370e+00  
Na -4.049580e+00 -4.049580e+00 -4.049580e+00

Na -2.024790e+00 -2.024790e+00 -4.049580e+00  
Na 0.000000e+00 0.000000e+00 -4.049580e+00  
Na 2.024790e+00 2.024790e+00 -4.049580e+00  
Na 4.049580e+00 4.049580e+00 -4.049580e+00  
Na -4.049580e+00 -6.074370e+00 -2.024790e+00  
Na -2.024790e+00 -4.049580e+00 -2.024790e+00  
Na 0.000000e+00 -2.024790e+00 -2.024790e+00  
Na 2.024790e+00 0.000000e+00 -2.024790e+00  
Na 4.049580e+00 2.024790e+00 -2.024790e+00  
Na 6.074370e+00 4.049580e+00 -2.024790e+00  
Na -2.024790e+00 -6.074370e+00 0.000000e+00  
Na 0.000000e+00 -4.049580e+00 0.000000e+00  
Na 2.024790e+00 -2.024790e+00 0.000000e+00  
Na 4.049580e+00 0.000000e+00 0.000000e+00  
Na 6.074370e+00 2.024790e+00 0.000000e+00  
Na 0.000000e+00 -6.074370e+00 2.024790e+00  
Na 2.024790e+00 -4.049580e+00 2.024790e+00  
Na 4.049580e+00 -2.024790e+00 2.024790e+00  
Na 6.074370e+00 0.000000e+00 2.024790e+00  
Na 2.024790e+00 -6.074370e+00 4.049580e+00  
Na 4.049580e+00 -4.049580e+00 4.049580e+00  
Na 6.074370e+00 -2.024790e+00 4.049580e+00  
Na -4.049580e+00 2.024790e+00 -6.074370e+00  
Na -2.024790e+00 4.049580e+00 -6.074370e+00  
Na -6.074370e+00 -2.024790e+00 -4.049580e+00  
Na -4.049580e+00 0.000000e+00 -4.049580e+00  
Na -2.024790e+00 2.024790e+00 -4.049580e+00  
Na 0.000000e+00 4.049580e+00 -4.049580e+00  
Na 2.024790e+00 6.074370e+00 -4.049580e+00  
Na -6.074370e+00 -4.049580e+00 -2.024790e+00  
Na -4.049580e+00 -2.024790e+00 -2.024790e+00  
Na -2.024790e+00 0.000000e+00 -2.024790e+00  
Na 0.000000e+00 2.024790e+00 -2.024790e+00

Na 2.024790e+00 4.049580e+00 -2.024790e+00  
Na 4.049580e+00 6.074370e+00 -2.024790e+00  
Na -4.049580e+00 -4.049580e+00 0.000000e+00  
Na -2.024790e+00 -2.024790e+00 0.000000e+00  
Na 0.000000e+00 0.000000e+00 0.000000e+00  
Na 2.024790e+00 2.024790e+00 0.000000e+00  
Na 4.049580e+00 4.049580e+00 0.000000e+00  
Na -4.049580e+00 -6.074370e+00 2.024790e+00  
Na -2.024790e+00 -4.049580e+00 2.024790e+00  
Na 0.000000e+00 -2.024790e+00 2.024790e+00  
Na 2.024790e+00 0.000000e+00 2.024790e+00  
Na 4.049580e+00 2.024790e+00 2.024790e+00  
Na 6.074370e+00 4.049580e+00 2.024790e+00  
Na -2.024790e+00 -6.074370e+00 4.049580e+00  
Na 0.000000e+00 -4.049580e+00 4.049580e+00  
Na 2.024790e+00 -2.024790e+00 4.049580e+00  
Na 4.049580e+00 0.000000e+00 4.049580e+00  
Na 6.074370e+00 2.024790e+00 4.049580e+00  
Na 2.024790e+00 -4.049580e+00 6.074370e+00  
Na 4.049580e+00 -2.024790e+00 6.074370e+00  
Na -6.074370e+00 2.024790e+00 -4.049580e+00  
Na -4.049580e+00 4.049580e+00 -4.049580e+00  
Na -2.024790e+00 6.074370e+00 -4.049580e+00  
Na -6.074370e+00 0.000000e+00 -2.024790e+00  
Na -4.049580e+00 2.024790e+00 -2.024790e+00  
Na -2.024790e+00 4.049580e+00 -2.024790e+00  
Na 0.000000e+00 6.074370e+00 -2.024790e+00  
Na -6.074370e+00 -2.024790e+00 0.000000e+00  
Na -4.049580e+00 0.000000e+00 0.000000e+00  
Na -2.024790e+00 2.024790e+00 0.000000e+00  
Na 0.000000e+00 4.049580e+00 0.000000e+00  
Na 2.024790e+00 6.074370e+00 0.000000e+00  
Na -6.074370e+00 -4.049580e+00 2.024790e+00



Na -4.049580e+00 -2.024790e+00 2.024790e+00  
Na -2.024790e+00 0.000000e+00 2.024790e+00  
Na 0.000000e+00 2.024790e+00 2.024790e+00  
Na 2.024790e+00 4.049580e+00 2.024790e+00  
Na 4.049580e+00 6.074370e+00 2.024790e+00  
Na -4.049580e+00 -4.049580e+00 4.049580e+00  
Na -2.024790e+00 -2.024790e+00 4.049580e+00  
Na 0.000000e+00 0.000000e+00 4.049580e+00  
Na 2.024790e+00 2.024790e+00 4.049580e+00  
Na 4.049580e+00 4.049580e+00 4.049580e+00  
Na -2.024790e+00 -4.049580e+00 6.074370e+00  
Na 0.000000e+00 -2.024790e+00 6.074370e+00  
Na 2.024790e+00 0.000000e+00 6.074370e+00  
Na 4.049580e+00 2.024790e+00 6.074370e+00  
Na -6.074370e+00 4.049580e+00 -2.024790e+00  
Na -4.049580e+00 6.074370e+00 -2.024790e+00  
Na -6.074370e+00 2.024790e+00 0.000000e+00  
Na -4.049580e+00 4.049580e+00 0.000000e+00  
Na -2.024790e+00 6.074370e+00 0.000000e+00  
Na -6.074370e+00 0.000000e+00 2.024790e+00  
Na -4.049580e+00 2.024790e+00 2.024790e+00  
Na -2.024790e+00 4.049580e+00 2.024790e+00  
Na 0.000000e+00 6.074370e+00 2.024790e+00  
Na -6.074370e+00 -2.024790e+00 4.049580e+00  
Na -4.049580e+00 0.000000e+00 4.049580e+00  
Na -2.024790e+00 2.024790e+00 4.049580e+00  
Na 0.000000e+00 4.049580e+00 4.049580e+00  
Na 2.024790e+00 6.074370e+00 4.049580e+00  
Na -4.049580e+00 -2.024790e+00 6.074370e+00  
Na -2.024790e+00 0.000000e+00 6.074370e+00  
Na 0.000000e+00 2.024790e+00 6.074370e+00  
Na 2.024790e+00 4.049580e+00 6.074370e+00  
Na -6.074370e+00 4.049580e+00 2.024790e+00

Na -4.049580e+00 6.074370e+00 2.024790e+00  
Na -6.074370e+00 2.024790e+00 4.049580e+00  
Na -4.049580e+00 4.049580e+00 4.049580e+00  
Na -2.024790e+00 6.074370e+00 4.049580e+00  
Na -4.049580e+00 2.024790e+00 6.074370e+00  
Na -2.024790e+00 4.049580e+00 6.074370e+00

**Atomic coordinates of Na 0.50 nm nanoparticle**

Na 2.024790e+00 -2.024790e+00 -4.049580e+00  
Na 2.024790e+00 -4.049580e+00 -2.024790e+00  
Na 4.049580e+00 -2.024790e+00 -2.024790e+00  
Na -2.024790e+00 -2.024790e+00 -4.049580e+00  
Na 0.000000e+00 0.000000e+00 -4.049580e+00  
Na 2.024790e+00 2.024790e+00 -4.049580e+00  
Na -2.024790e+00 -4.049580e+00 -2.024790e+00  
Na 0.000000e+00 -2.024790e+00 -2.024790e+00  
Na 2.024790e+00 0.000000e+00 -2.024790e+00  
Na 4.049580e+00 2.024790e+00 -2.024790e+00  
Na 0.000000e+00 -4.049580e+00 0.000000e+00  
Na 2.024790e+00 -2.024790e+00 0.000000e+00  
Na 4.049580e+00 0.000000e+00 0.000000e+00  
Na 2.024790e+00 -4.049580e+00 2.024790e+00  
Na 4.049580e+00 -2.024790e+00 2.024790e+00  
Na -2.024790e+00 2.024790e+00 -4.049580e+00  
Na -4.049580e+00 -2.024790e+00 -2.024790e+00  
Na -2.024790e+00 0.000000e+00 -2.024790e+00  
Na 0.000000e+00 2.024790e+00 -2.024790e+00  
Na 2.024790e+00 4.049580e+00 -2.024790e+00  
Na -2.024790e+00 -2.024790e+00 0.000000e+00  
Na 0.000000e+00 0.000000e+00 0.000000e+00  
Na 2.024790e+00 2.024790e+00 0.000000e+00  
Na -2.024790e+00 -4.049580e+00 2.024790e+00

Na 0.000000e+00 -2.024790e+00 2.024790e+00  
Na 2.024790e+00 0.000000e+00 2.024790e+00  
Na 4.049580e+00 2.024790e+00 2.024790e+00  
Na 2.024790e+00 -2.024790e+00 4.049580e+00  
Na -4.049580e+00 2.024790e+00 -2.024790e+00  
Na -2.024790e+00 4.049580e+00 -2.024790e+00  
Na -4.049580e+00 0.000000e+00 0.000000e+00  
Na -2.024790e+00 2.024790e+00 0.000000e+00  
Na 0.000000e+00 4.049580e+00 0.000000e+00  
Na -4.049580e+00 -2.024790e+00 2.024790e+00  
Na -2.024790e+00 0.000000e+00 2.024790e+00  
Na 0.000000e+00 2.024790e+00 2.024790e+00  
Na 2.024790e+00 4.049580e+00 2.024790e+00  
Na -2.024790e+00 -2.024790e+00 4.049580e+00  
Na 0.000000e+00 0.000000e+00 4.049580e+00  
Na 2.024790e+00 2.024790e+00 4.049580e+00  
Na -4.049580e+00 2.024790e+00 2.024790e+00  
Na -2.024790e+00 4.049580e+00 2.024790e+00  
Na -2.024790e+00 2.024790e+00 4.049580e+00
